# Supplementary material for: Identification of a Conserved Non-Protein-Coding Genomic Element that Plays an Essential Role in Alphabaculovirus Pathogenesis
Source: PubMed Central journal article supplement (PMC3989284; doi:10.1371/journal.pone.0095322), 2014-04-16

Figure S1

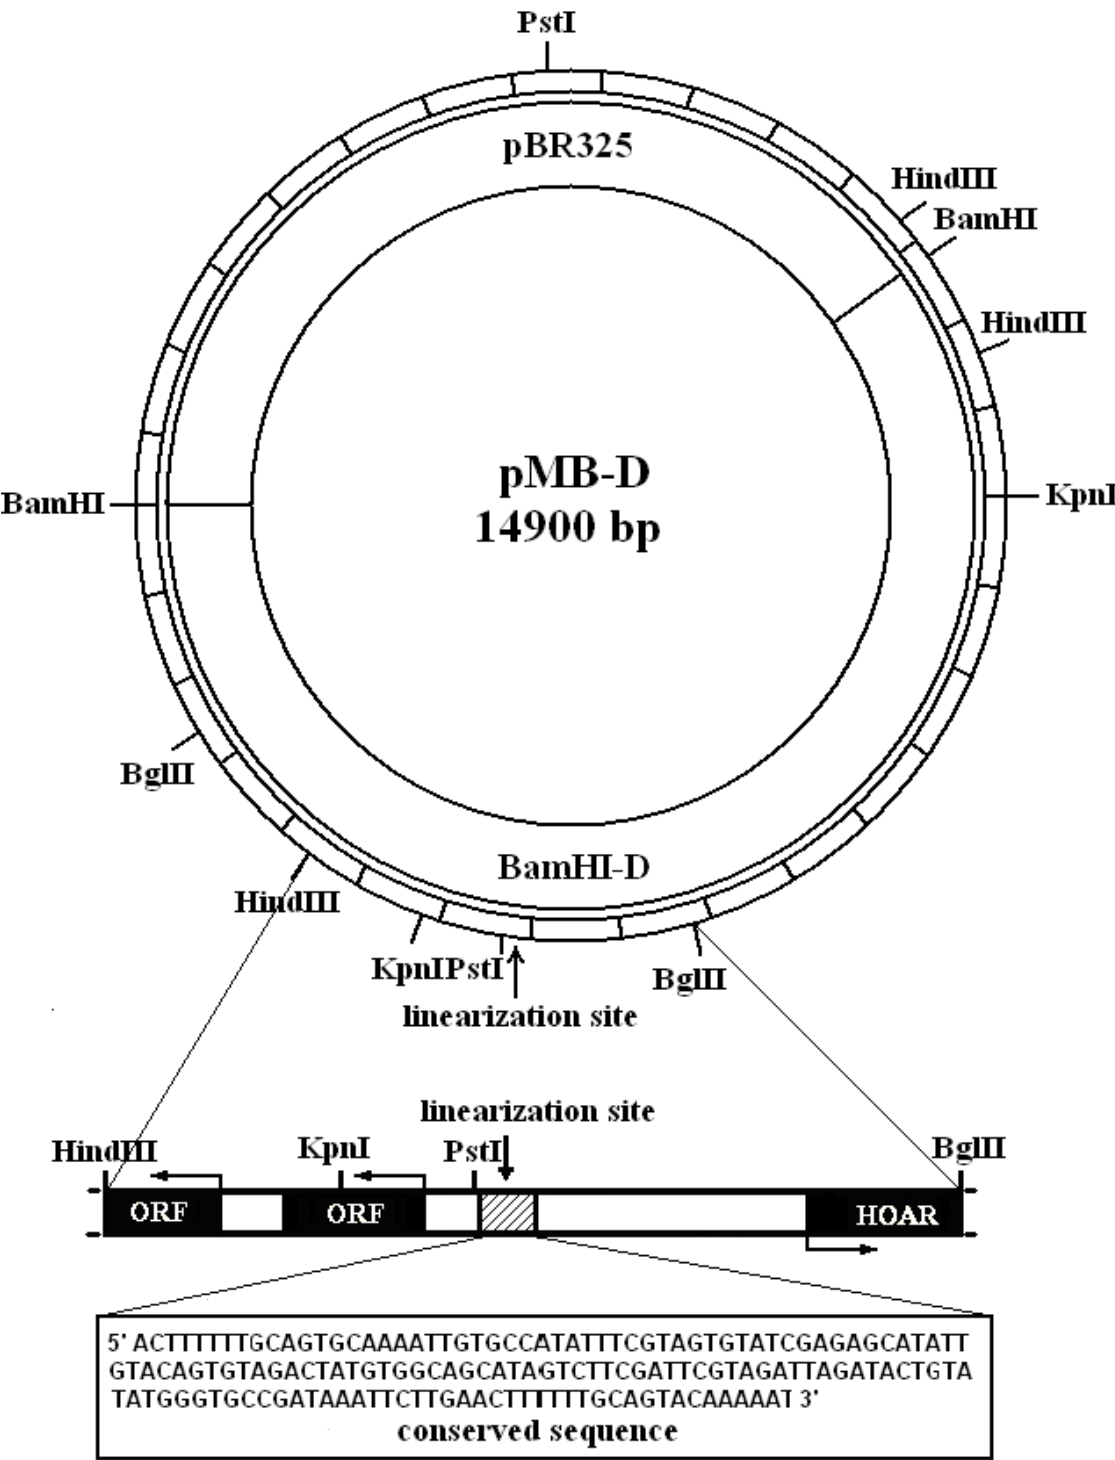

Supplement: pone.0095322.s001.pdf [file pone.0095322.s001.pdf]
