# Supplementary material for: Identification of a Conserved Non-Protein-Coding Genomic Element that Plays an Essential Role in Alphabaculovirus Pathogenesis
Source: PubMed Central journal article supplement (PMC3989284; doi:10.1371/journal.pone.0095322), 2014-04-16
Supplement: pone.0095322.s002.pdf [file pone.0095322.s002.pdf]

Figure S2

```
1 aagctttggt gaacgacaaa attgtatcga gtggtagtgt gtgtgcatgt gtatacataa
61 atgtacttgt gttgtctaaa atgtcatcct ctaaagaatg cataaactct attaaataat
121 ctaacggctc accattcgaa acctcaggaa gagtcacggt gtcgtctaaa gatggttgac
181 tctcctcctg ttgacgctcc tgctgatgct gatcctgtcg atgctgattt tgctcttgc
241 gaatctgttc ctcttgatgt tcctgctgaa tctgttgaac ttgttcttgc tgaagaaaac
301 cgttcgctga cgtgctaggt acgtcgacgg ctgtagcgac agcgcttgtt atgagtagag
361 aatcttgaat ttcggtaaaa gacatgtcag agttttgaat cgttctcgtt taataagaag
421 gtatatgacg aggaccagta tcaccctcag acataggttt gacaagtggg gcttttctat
481 catccacaga aaaatattga ttatttacat cattaatcca attatcaata cgtctcaatg
541 catcatcggc cgggtgttgg tagtcgattt gcagaagttt ctgcttcac gccaatagtc
601 aatgcttgta tacttgacct tacaatattt tcgtcgtcgt ggcgttcagt tgcattgcta
661 gtcgacatac attgactggt agaggcgata ggttctaaga cggtaacctg agtaaatccg
721 ctgccactag ctttgtttct ggcgtcggct ttgctgattt tactcacgct gttgattctg
781 ctggctacgc tgctaagtct gctgttcgct ctattactga cctgggtgct ggcaataaag
841 cttgccctgg tgcgggccct agtgctggca ataaggcttg ctctgggtgct tgccctggtg
901 ctggccctgg tgcttgccct ggtgcttacc gtggtgctgg ctgattgaaa agttttcata
961 ttgctgcttg aataaactgc taataaaatt gctgaaccg aacatggcaa tgaaaggttt
1021 gttggccatt atatattaaa ttctaacta aataatttag attatcacac cgatatacaa
1081 attttatcga attaaaccct tttcgggtaa ttgatgtgtt tactgtaaac ctgcagatag
1141 gaatagataa cgaaactttt tgcagtcaa aattgtcca tattcgtag tgtatcgaga
1201 gcatattgta cagtgtagac tatgtggcag catagtctt gattcgtaga ttagatactg
1261 tatatgggtg ccgataaatt cttgaacttt tttgcagtac aaaaatttcc atgacgcatt
1321 ttgcgcacga caccatttgt acttatcaag gccgcagccg caccacgcgt gatcatgtga
1381 cegtgtctatc gatcacgcca ttcagttatc atatcacatg acaaggcagg atgtttgttg
1441 aagcggaaac ttttatcaag gtcgtcgcgt cggacatagg ggcgccgagt cttatcacat
1501 ccatgacgcg cgcgcacata catacacaca tcgacacttt acgaagtcta taaaagatt
1561 gatcgcaatg tttgcttaca gtttcattac gaaaacgcca cggccaagat at_gagttctgaa
1621 tatcataaaa atattcaatt gtggtacaat ggtgttgaga atcaattggt ggtctatttg
1681 tgtttacccc aaacgaataa acgtgttcgt gttggttatt ggtgccagga gtccgacgag
1741 atcaaattca acgggatttc atttaaact tacaccagcgt acaacagcaa aatggaggtg
1801 tactataact atatatgtag tttaacgaat cctctgaaaa gaaagcatga agctattttg
1861 acgctgattg tcaaattaaa cgttatagag cacatcaatg aatatctaaa gttatatatg
1921 gagttctata gcaaagagag aactaatgta cccaagtata tgatgatgat caacgaaatg
1981 cttcaaagcg aaactactaga ttcgagcatg gagatagctg caaaagtta caaacgattc
2041 aataaactgt ccaaggaatt aagaagtgtt aacaccattg aaaagataga tct
```
