# Supplementary material for: Identification of a Conserved Non-Protein-Coding Genomic Element that Plays an Essential Role in Alphabaculovirus Pathogenesis
Source: PubMed Central journal article supplement (PMC3989284; doi:10.1371/journal.pone.0095322), 2014-04-16
Supplement: pone.0095322.s003.pdf [file pone.0095322.s003.pdf]

Figure S3

Apci AC TTTTTCGCTGTGCAAAAATGTCACCTTAATCCTAGTATATTGAGAGCATATAGTACAGTCAAGACTATGTAAGTAAATAGTCTACGAAATCGAAATTTTCCACA GGATATGGCCGAGTCAATATTAGTGACCTTTTTTGTACTGCAAAAAAT155  
Ro AC TTTTTCGCAATGCAAAAAGTTCATAGTGTAGTATATTGGGAGCGTATGTACAGTGTAGACTATCTAA TAAATAGTCTACGATTGTAGAGTTTGTATTT GTATATGGATGCCGAGCAAAAAGTGAACTTTTTTCGATGCAAAAAAGT156  
Plxy AC TTTTTCGCAATGCAAAAAGTTCATAGTGTAGTATATTGGGAGCGTATGTACAGTGTAGACTATCTAA TAAATAGTCTACGATTGTAGAGATTGTACT GTATATGGAGTGTACGGCAAAAAGTGAACTTTTTTCGATGCAAAAAAT156  
Anpe AC TTTTTCGCACTGCAAAAAGTTCGTTTATAGGCTAGTCTATTGGCAGCGTATGAACAGTGTAGACTATTTAG TAAATAGTCTACGAAACGTAGACTTTTGTACT GTATATGGGCCGTCCGCAAAAACGTGTTTTTTTGTACTACAAAAAGT156  
Hycu AT TTTTTCGCACTGCAAAAAGTTCATCTGTGTAGTCTATTAGGAGCGTATGAACAGTGTAGACTATCTAAG TAAATAGTCTACGAAATGTAGACTTTTCTCT GTATATGGGCTGTCTTCGATAACCTTTTTTTCGATGCAAAAAAGT156  
Ac AC TTTTTCGCAATGCAAAAAGTTCATAGTGTAGTATATTGGGAGCGTATGTACAGTGTAGACTATCTAA TAAATAGTCTACGATTGTAGAGATTGTACT GTATATGGAGTGTACGGCAAAAAGTGAACTTTTTTCGATGCAAAAAAT156  
Orle AC TTTTTCGCAATGCAAAAAGTTCCTTAATCCTAGTATATTGAGAGCATATAGTACAGTGTAGACTATCTAG TAAATAGTCTACGATTCTAATATTGTTCTG GTATATGGCCCTGTATCAAACTCGATTTTTTTTTCGACTACAAAAAGT156  
Boma AC TTTTTCGCAATGCAAAAAGTTCATAGTGTAGTATATTGGGAGCGTATAGTACAGTGTAGACTATCTAA TAAATAGTCTACGATTGTAGAGTTCTACT GTATATGATATGTCAACATAGCGCAACTTTTTTCGATGCAAAAAAT156  
Mavi AC TTTTTCGCAATGCAAAAAGTTCATCTGTGTAGTATATTGGGAGCATATAGAACAGTGTAGACTATCTAA TAAATAGTCTACGATTGTAGACTTTTGTACT GTATATAGGGGTGCTGCCAACCTGACTTTTTTTCGATGCAAAAAAT156  
Bm AC TTTTTCGCAATGCAAAAAGTTCATAGTGTAGTATATTGGGAGCGTATAGTACAGTGTAGACTATCTAA TAAATAGTCTACGATTGTAGACTTTCTACT GTATATGATATGTCAACATAGCGCAACTTTTTTCGATGCAAAAAAT156  
Ld AC TTTTTCGCACTGCAAAAAGTTCAGGGAATCCTAGTCTATGGAGAGCGTCTCTACATCGTAGACTATGCGGTC AATAGTCTACGATCGCACGTTTTCTCT GTATATGGGTCTCGATTCCGAGGCCACTTTTTTTCGATGCAAAAAAT154  
Lyxy AC TTTTTCGCACTGCAAAAAGTTCAGGGAATCCTAGTCTATGGAGAGCATCTCTACATCGTAGACTATGCGG TCAATAGTCTACGATTGCAACGTTTTCTCT GTATATGGGTGTCAATTTAGAGGCTCTTTTTTTCGATGCAAAAAAGT154  
Clbi AC TTTTTCGCACTTCAAAAAACATATAATTTAGTATATTGGGAGCATATCTACATCTGAGACTATGTAAT TAAATAGTCTACGATTGCAATAATCTCT GTATATGGAGCGTCAATATAGCGACTTTTTTTCGATGCAAAAAAGT155  
Agip AC TTTTTCGCACTGCAAAAAGTTCCTTAAGTCTAGTATATTGGAGAGCATATGTACAGTGTAGACTATGCTAG TAAATAGTCTACGATTGCAATAATCTCT GTATATGGAGTCTAATCTAATGCAATTTTTTTCGATGCAAAAAAGT154  
Splt AC TTTTTCGCACTGCAAAAAGTTCCTTAAGTCTAGTATATTGGAGAGCATATGTTTCACTGTAGACTATGCTAG TAAATAGTCTACGATTGCAATAATCTCT GTATATGGGTCTCTGTATGGAACTAATTTTTTTCGATGCAAAAAAGT155  
Sf AC TTTTTCGCACTGCAAAAAGTTCCTTAAGTCTAGTATATTGGAGAGCATATCTACAGTGTAGACTATGCTAG TAAATAGTCTACGATTGCAATAATCTCT GTATATGATATGCCATATCTAATCAACATTTTTTTCGACTACAAAAAGT155  
MacoA AC TTTTTCGCACTGCAAAAAGTTCCTTATAGTGTAGTATATTGGGCCATATACTACAGTGTAGACTATGCTAG TAAATAGTCTACGATTGCAATAATCTCT GTATATGGGTGTAGGATCAGAGCTGACTTTTTTTCGATGCAAAAAAGT155  
Ecob AC TTTTTCGCACTGCAAAAAGTTCGCAATAATGTAATATATTGCCAGCATATAGTACAGTGTAGACTATGCTAG TAAATAGTCTACGAAATCGAAATTTTCTCT GTATATAGGGCCTCTTTTAAACCAATTTTTTTCGATGCAAAAAAT156  
Splt AC TTTTTCGCACTGCAAAAAGTTCATCTATTTCTAGTATATTGAATCCATATATACAGTGTAGACTTTGCTAG TAAATAGTCTACAAATTCGAAATTTTGTACT GTATATGATCATCTCCCGTAGCCGAATTTTTTTCGATGCAAAAAAT154  
HearS AC ATTTTTCGCTGTGCAAAAATGTCCTATTTTTSTAGTATATTGGGAGCATATGTACAGTGTAGACTATCTCG TAAATAGTCTTTCGATTGCAAAATTTCCACT GTATATGGATGACTCATTAAACGAATTTTTTTCGATGCAAAAAAT155  
Lese AC TTTTTCGCACTGCAAAAAGTTCCTCTGTGTAGTATATTGGGAGCATATGTACAGTGTAGACTTTGCTAG TAAAGTCTTTCGAAATCGAACTATTTCCACT GTATATAGGCTCTGATTTTTTATCTCTTTTTTTCGACTACAAAAAGT156  
HearM AC TTTTTCGCACTGCAAAAAGTTCCTTATAGTGTAGTATATTGGAACCATATGTACAGTGTAGACTATGCTAG TAAATAGTCTACGATTGCAATAATCTCT GTATATGGGTGTCCGAATAGAGTGAATTTTTTTCGATGCAAAAAAGT155  
Se AC TTTTTCGCACTGCAAAAAGTTCCTTAAGTCTAGTATATTGGAGAGCATATGTTTCACTGTAGACTATGCTAG TAAATAGTCTACGATTGCAATAATCTCT GTATATGGCCTTGGAAATGATGCAACCTTTTTTTCGACTACAAAAAGT155  
Mb AC TTTTTCGCACTGCAAAAAGTTCCTTATAGTGTAGTATATTGGAACCATATGTACAGTGTAGACTATGCTAG TAAATAGTCTACGATTGCAATAATCTCT GTATATGGGTGTCCGATTAGAGTGAATTTTTTTCGATGCAAAAAAGT155  
MacoB AC TTTTTCGCACTGCAAAAAGTTCCTTATAGTGTAGTATATTGGAACCATATGTACAGTGTAGACTATGCTAG TAAATAGTCTACGATTGCAATAATCTCT GTATATGGGTGTCCGATTAGAGTGAATTTTTTTCGATGCAAAAAAGT155  
Agse AT TTTTTCGCTGTGCAAAAAGTTCCTTAAGTCTAGTATATTGGAGAGCATATATACAGTGTAGACTATGCTAG TAAATAGTCTACGATTGCAACTTTTCCACT GTATATGGCCTTGGAAATGATGACTTTTTTTCGATGCAAAAAAT155  
Eups AG TTTTTCGCTTATACAAAAACCTCTTAATATAGTATATTGAGAGCATATATGCACTGTAGACTATCTAGG GTAAATAGTCTACGATTGTAAATTTTCCGCT GTATATTTGACCTTGAATAAAGCAATTTTTTTCGACTACAAAAAGT155  
Ag A CTTTATTGCACTGCAAAAAGTTCATATGCGCTAGTCTATTGGGAGCGTATACGACAGTGTAGACTATCTAAG TAAATAGTCTACGAAACGTAGACTTTTGTATGT GTATATAGGGTATAGGCAAAATGCAATTTTTTTCGATGCAAAAAAGT157  
CfDEF AC TTTTATTGCACTGCAAAAAGTTCGATCTGTGTAGTCTATTGGGAGCGTATACAACAGTGTAGACTATCTAAG TAAATAGTCTACGAAACGTAGACTTTCTATGT GTATATAGGGTGTCCGATATAAAGTGAACTTTTTTCGACTGCAAAAAAGT157  
Op AC TTTTTCGCACTGCAAAAAGTTCATCTGTGTAGTCTATTGGGAGCGTATACAACAGTGTAGACTATTTATG TAAATAGTCTACGAAACGTAGACTTTTGTACT TGTATGGGCCCGCTGCAAAAGCTGTTTTTTCGACTGCAAAAAAGT156  
Cf AC TTTTTCGCACTGCAAAAAGTTCATCTGTGTAGTCTATTGGGAGCGTATACAACAGTGTAGACTATTTATG TAAATAGTCTACGAAACGTAGACTTTTGTACT TGTATGGGCCCGCTGCAAAAGCTGTTTTTTCGACTGCAAAAAAGT156  
Thor GC TTTTTCGCACTGCAAAAAGTTCATCTGTGTAGTATATTGGGAGCGTATGTACAGTGTAGACTATCTAA TAAATAGTCTACGATTGTAGACTTTTGTACT TGTATATAGGGTCCAGCCAAAATTAACTTTTTTCGAAATGCAAAAAAT156  
Eppo AA TTTTTCGCACTTCAAAAAATTCATCTGTGTAGTCTATTGGGAGCGTATGAACAGTGTAGACTATCTAAG TAAATAGTCTACGATTGTACTTTTTGTACT TGTCTATAGGGTCTCAGAAAAATGAACTTTTTTCGACTGCAAAAAAGT156  
Mane AC TTTTTCGCACTGCAAAAAGTTCCTTAAAGTCTAGTCTATTGGAGAGCATATGTACAGTGTAGACTATGCTG CACATAGTCTTTCGATTGTAGATTAGTACT TGTATATGGGTGCCATAAATCTTGAACTTTTTTCGACTACAAAAAT155  
Adho AC TTTTTCGCTTCAAAAAAGGCTCTTAAGTCTAGTCTATTGGAGAGCATATGTACAGTGTAGACTTTGCTCT TAAAACAGTCTACGATTGCAATAATCTCTG CACTATGGGTGCAAAAAATTTAGGTACTTTTTTTCGATGCAAAAAAT156  
Ador AC TTTTTCGCTTCAAAAAAGGCTCTTAAGTCTAGTCTATTGGAGAGCATATGTACAGTGTAGACTTTGCTCT TAAAACAGTCTACGATTGCAATAATCTCTG CACTATGGGTGCAAAAAATTTAGGTACTTTTTTTCGACTGCAAAAAAT156  
Cc AC TTTTTCGCTGCAAAAAGTCTCTTAAGTCTAGTATATTGGAGAGCATATGTACAGTGTAGACTATCTAAG TAAATAGTCTACGATTGTAGACTTTTTTGTACT GTATATGGATGCCGATCAATGAACTTTTTTCGATGCAAAAAAT156  
Tn AC TTTTTCGCTGCAAAAAGGCTCAAAATGTAGTATATTGGAGAGCATATGTTTCACTGTAGACTATCTAAG TAAATAGTCTACGATTGTAGACTTTTTTGTACT GTATATGGATGCCCGCCGATAACGAACTTTTTTCGACTACAAAAAT156  
cons ac.tTTTTCGcagTgCAAAAaagtcattatngTAgTaTATTgagagcaTaTngtaCagtGtAGACTaTgctag.taaaAtAGTCTaCgAttcgnAaattttgtact.gtaTATgggnnnagagnaagngaattTTTTTTCganTgCAAAAaagT
