# Supplementary material for: Identification of a Conserved Non-Protein-Coding Genomic Element that Plays an Essential Role in Alphabaculovirus Pathogenesis
Source: PubMed Central journal article supplement (PMC3989284; doi:10.1371/journal.pone.0095322), 2014-04-16
Supplement: pone.0095322.s004.pdf [file pone.0095322.s004.pdf]

FIGURE S4

PAS ◆

131101 gtcattttat gttcaacttg gctggtcttg gctcgcagct cggacagttc tttttGcaat

131161 tgctccacat agttcaagtc cgtggtgtga ttgttgaccg tgttattttc taaaagctcg

131221 cgccaatgct gtttgatgga atcctgggta cgagtgaagt taatgggcat aaattctaca

131281 taccctgtct tattgtacac ggcacaatct gatgaagtag cgctgcaaaa acatttgtac

131341 acagaattgt ccataattat cttgacataa cacttgaaac acacagcatg gttacaatga

131401 atcgaagtca caaacgagga atttacgttt ttagtgtctt taaaagtagt aaaacaaata

131461 ttacacgaaa cctctacttc ttcttcgggt tctgattgct gctgctgctg ctgctgggc

131521 tgcggagact gggcgaggc aaacaaatct ggcgactgtg gtattacgta attcggcgaa

131581 taagatggac tatAagtggg agaccttggg gcaatctcat tcatcagctg agcctcaaga

131641 tctaaacctc gttgcagagc cctctgcgca gctgtctcgg acgcaatggt atcctggtag

131701 tgctgggcag tgatgtcggg aaaccgttca cgatccacat tttactatt aattagtagt

131761 acgtcatcct cttgacttaa tagcggatcg tcattgctaa tgtaaacctg accgtgcacg

131821 taatacgtga caccctgacg atggtagggt cgcgtaacg gctcgttgac gttcccgata

131881 atctgcacgt tttcttcgct gacacgctgc tctgacgcc gctcctgacg gcgatggctg

131941 cgactgcttg aagacggctg gctgcgactg cttgaagacg gctgggcttc gggagatggt

132001 gtaaagttga tgcggcgacg gctgagagac agcctgtggc ggcggctgct gctgggagtg

132061 gggcgcttga tttggcgact catggctggg ctggtaggat actgttcaact aggctgtgag

132121 gcttgaactg tgcttacgag tagaacggca gctgtattta tactgtttat cagtactgca

132181 cgactgataa gacaatagtg gtgggggaac ttgccaggca aadatgaact tttttgtaat

132241 gcaaaaaagt tgatagtgtg tagtatatt gggagcgtat cgtacagtg agactattct

132301 aataaaatag tctacgattt gtagagattg tactgtatat ggagtgtcag gcaaaagtga

132361 acttttttgc attgcaaaaa aattcatttt aaatttatca\_tatcacaggc\_tgcagtttct

132421 gttatctgtc cccactcag gcggtgcagct ataaaagcag gcaactacca actcgtaaagc

132481 acagttcgtt gtgaagtga cacggagagc ctgccataa gcaaaatgcc aagggacacc

132541 aacaatgcc accggtctac gccatatgaa cgtcctacgc ttgaagatct ccgcagacag

132601 ttgcaagaca atttgacag cataaacgc cgagacagaa tgcaagaaga acaagaagaa

132661 aacctgcgct atcaagtgc tagaaggcag cgtcaaaacc agctcgcctc catacaaatg

132721 gaacagcagc gaatgatggc ggaattaaac aacgagccgg tgattaattt taaatttgag

132781 tgtagtgtgt gtttagaaac atattcccaa caatctaacg atacttgtcc ttttttgatt

132841 ccgactacgt gcgaccacgg tttttgtttc aaatgcgtca tcaatctgca aagcaacgg

132901 atgaatattc cgcattccac tgtgtgctgt ccatttgtga ataccaggt aaaaatgtgg

132961 cgttctTaa agcctaacgc tgttgtgacg tgtaagtttt acaagaaaac tcaagaaaga
