# Supplementary material for: Identification of a Conserved Non-Protein-Coding Genomic Element that Plays an Essential Role in Alphabaculovirus Pathogenesis
Source: PubMed Central journal article supplement (PMC3989284; doi:10.1371/journal.pone.0095322), 2014-04-16
Supplement: pone.0095322.s005.pdf [file pone.0095322.s005.pdf]

## Figure S5

### 1. Adoxophyes honmai nucleopolyhedrovirus

8334-8534

NC\_004690

CCACCACAGCTTGCCTATGTATGAACTTTTTTGTCTTCAAAAAAGGACCTTAAAGTGTAGTGT  
ATTTAGAGCATATAGTACAGTGTAGACTTTGTCTATTAACAGTCTACGATTTCGAAATTTTCGTT  
CGGGATATGGGTTGGAAAAAATTAGGTTACTTTTTTGTAGTGCAAAAAATGAAAATTGAAAAT  
AGATATA

GTAGACTTTGTCTATTAACAGTCTAC-DSc

CTTTTTTGTCTTCAAAAAAG-DSI

TTTTTTGTAGTGCAAAAA-DSr

---

### 2. Adoxophyes orana nucleopolyhedrovirus

8141-8340

NC\_011423

CACCACAGCTTGCCTATGTATGAACTTTTTTGTCTTCAAAAAAGGACCTTAAAGTGTAGTGTATT  
TAGAGCATATAGTACAGTGTAGACTTTGTCTATTAACAGTCTACGATTTGAAATTTTGTCTG  
GATATGAGTAAAAAAAATTAGGGTACTTTTTTGCCTGCAAAAAATGAAATTAATAAATTTAT  
ATAG

GTAGACTTTGTCTATTAACAGTCTAC-DSc

CTTTTTTGTCTTCAAAAAAG-DSI

TTTTTTGCCTGCAAAAA-DSr

---

### 3. Agrotis ipsilon multiple nucleopolyhedrovirus strain Illinois

6127-6326

NC\_011345

CGCCTATGCACTTTTGATAGTGAACCTTTTTTGTAGTGCAAAAAATGTACCTTAAAGTGTAGTATATG  
GAGAGCATATTGTACAGTGTAGACTATGCTAGTATAATAGTCTACGATTTCGAAATTTTCCACTGT  
ATATCGAGGTCATAATTCTAATCAATATTTTTGCCTCCAAAAAGGCGATAGCGGAAACGAGGC  
AGAG

GTAGACTATGCTAGTATAATAGTCTAC-DSc

TTTTTGTAGTGCAAAAA-DSI

TTTTTGCCTCCAAAA-DSr

---

4. *Agrotis segetum* nucleopolyhedrovirus

5898-6098

NC\_007921

AGGTCGTCACGGTTAGTCACGCAGCCAT **TTTTTTGCTGTGCAAAAAA**GTGCCTTAAAGTGTAGT  
ATATGGAGAGGATATATTACAGT **GTAGACTATGCTAGTATAATAGTCTAC**GATTCGAACTTTT  
CCACTGTATATTGGCCTTGAAAAATGATGACT **ATTTTTGCACTGCAAAAAAT**GTTGATAAGCCT  
CAGGAGGTGG

**GTAGACTATGCTAGTATAATAGTCTAC**-DSc

**TTTTTTGCTGTGCAAAAAA**-DSI

**ATTTTTGCACTGCAAAAAAT**-DSr

---

5. *Antheraea pernyi* multiple nucleopolyhedrovirus-L2

6950-7150

NC\_008035

TTGCAGTACGTGAGTAAAGTAACGTACTT **TTTTGCACTGCAAAA**TAGTTGGTTTTAGGGTAGTG  
TATTGGCAGCGTATAGAACAGT **GTAGACTATTTAGGTAAAATAGTCTAC**GAAACGTAGACTTT  
GTACTGTATATGGGGCCGTGCGCAAAAACGTGT **TTTTTTGTACTACAAAAAA**GTTGGCGCAAAT  
TTATTAATTA

**GTAGACTATTTAGGTAAAATAGTCTAC**-DSc

**TTTTGCACTGCAAAA** -DSI

**TTTTTTGTACTACAAAAAA**-DSr

---

6. *Anticarsia gemmatalis* multiple nucleopolyhedrovirus, strain2D

(126100-126300)

NC\_008520

TTATAATTTAATA **TGAACTTTATTGCAGTGCAAAAAGTTCA**ATGTGCGGTAGTGTATTGGGA  
GCGTATACGACAGT **GTAGACTATTCAAGTTAAATAGTCTAC**GAAACGTAGAGTTTGTATGTGT  
ATATAGGGTATAGGACAAATG **TGAATTTTTTTGCATTGCAATAAAGTTCA**TATCTGCAAGTAA  
CGTGTTTACGTG

**GTAGACTATTCAAGTTAAATAGTCTAC**-DSc

**TGAACTTTATTGCAGTGCAAAAAGTTCA** -DSI **TGAATTTTTTTGCATTGCAATAAAGTTCA**-DSr

---

7. *Apocheima cinerarium* nucleopolyhedrovirus

(118818-118619)

FJ914221

TAAATAATGATATCATTGATTGTAAGT **TTTTTGCTGTGCAAAAAA**TGTGACTTAAATCGTAGTAT  
ATTGAGAGCATATAGTACAGT **GAAGACTATGTAAGTAAAATAGTCTAC**GAATCGAAATTTTCC  
ACAGGATATGGGCGAGTCATAATTAGTGACC **TTTTTTGTACTGCAAAAAA**ATTCATATCTGATA  
TGGTGATCAA

**GAAGACTATGTAAGTAAAATAGTCTAC**-DSc

**TTTTTGCTGTGCAAAAAA**-DSI

**TTTTTTGTACTGCAAAAAA**-DSr

---

8. *Autographa californica* multiple nucleopolyhedrovirus clone 6, complete genome

132204-132404

NC\_001623

GGGGAAGCTTGCCAGGCAAAAATGAACTTTTTTGTAAATGCAAAAAAGTTGATAGTGTAGTAGTA  
TATTGGGAGCGTATCGTACAGTGTAGACTATTCTAATAAAATAGTCTACGATTTGTAGAGATTG  
TACTGTATATGGAGTGTGAGGCAAAAGTGAACTTTTTTGCATTGCAAAAAATTCTTTTAAATT  
TATCATATC

GTAGACTATTCTAATAAAATAGTCTAC-DSc

AACTTTTTTGTAAATGCAAAAAAGTT-DSI

TTTTTTGCATTGCAAAAA-DSr

---

9. *Bombyx mandarina* nucleopolyhedrovirus, isolate S1

121284-121483

NC\_012672

GGGGAAGCTTGTCAGGCAAAAATGAACTTTTTTGTAAATGCAAAAAAGTTGATAGTGTAGTAGTAT  
ATTGAGAGCGTATAGTACAGTGTAGACTATTCTAATAAAATAGTCTACGATTTGTAGAGTTTCG  
ACTGTATATTATATGTCAAACATAGGCGAACTTTTTTGTATTGCAAAAAATTCATTTTTTAATT  
TATCATAT

GTAGACTATTCTAATAAAATAGTCTAC-DSc

AACTTTTTTGTAAATGCAAAAAAGTT-DSI

TTTTTTGTATTGCAAAAA-DSr

---

10. *Bombyx mori* nuclear polyhedrosis virus, isolate T3

122051-122251

NC\_001962

AGGGAAGCTTGTCAGGCAAAAATGAACTTTTTTGTAAATGCAAAAAAGTTGATAGTGTAGTAGTA  
TATTGAGAGCGTATAGTACAGTGTAGACTATTCTAATAAAATAGTCTACGATTTGTAGAGTTTCG  
TACTGTATATTATATGTCAAACATAGGCGAACTTTTTTGTATTGCAAAAAATTCATTTTTTAAT  
TTATCATAT

GTAGACTATTCTAATAAAATAGTCTAC-DSc

AACTTTTTTGTAAATGCAAAAAAGTT-DSI

TTTTTTGTATTGCAAAAA-DSr

---

11. *Choristoneura fumiferana* MNPV

124695-124895

NC\_004778

GCCGAGTCACGTAGGCGCGCGCAACTTTTTTGCAGTGCAAAAAATGTACATTACGTGGTAGTG  
TATAGAGAGCATATTAACAGTGTAGACTATTAAAGTAAATAGTCTACGAAACGAAGACTTT  
GTTCTGTATATGGGTCCTTGAAAATAATGATTATTTTTGCACCTTCAAAAAAGTTCATAACAACA  
CGGAAGTAAA

GTAGACTATTAAAGTAAATAGTCTAC-DSc

TTTTTGCAGTGCAAAAA-DSI

TTTTTGCACCTTCAAAAA-DSr

---

12. *Choristoneura fumiferana* defective multiple nucleopolyhedrovirus  
(125520-125720)  
NC\_005137

TGTACGCAAACATGTTAAGAGT **GAAC TTT ATT GCA GTG CAAAAA AG TTC** GATGTGTGGTAGTG  
TATTGGGAGCGTATACAACAGT **GTAG ACT ATT CAAG TTA AAT AGT CTAC** GAAACGTAGAGTTC  
GTATGTGTATATAGGGT GCGATATAAAAG **TGA ACT TTT TTT GCA CTG CAA TAA TGT TCA** TATTA  
GCCTATCACATG

**GTAGACTATTCAAGTTAAATAGTCTAC**-DSc

**GAAC TTT ATT GCA GTG CAAAAA AG TTC**-DSI **TGA ACT TTT TTT GCA CTG CAA TAA TGT TCA**-DSr

---

13. *Chrysoideixis chalcites* nucleopolyhedrovirus  
6632-6832  
NC\_007151

CATAAATATGATATAGCTCGAGATAA **ACT TTT TTT GTC GTG CAAAAA AG T** ACTCTAAAGTGTAG  
TATATTTACAGCATATTGTACAGT **GTAG ACT ATT CTAG TTA AAT AGT CTAC** GATTAGTAGATTT  
TGTTCTGTATATTGATGCCGATACGATAACGAAC **TTTT TTT GTAG TG CAAAAA** ATACGATAACG  
ATTATCGATA

**GTAGACTATTCTAGTTAAATAGTCTAC**-DSc

**ACT TTT TTT GTC GTG CAAAAA AG T**-DSI

**TTTT TTT GTAG TG CAAAAA**-DSr

---

14. *Clanis bilineata* nucleopolyhedrosis virus, strain DZ1  
(6263-6463)  
NC\_008293

GTTAATTTGTTAATGAAC **TTTT TTT GCA CTT CAAAAA** AACATTATAATTATAGTATATTGGGA  
GCATATCTTACACT **GTAG ACT AT GTAAAATAAATAGTCTAC** GATTTGAAATAATGTTCTGTATA  
TTGAAGCGTGAGATATAGCGACT **TTTT TTT GCATTACAAAAA** GTTCATATAATTTTTATGTGTA  
AAAATAATA

**GTAGACTATGTAAAATAAATAGTCTAC**-DSc

**TTTT TTT GCA CTT CAAAAA**-DSI

**TTTT TTT GCATTACAAAAA**-DSr

---

15. *Ecotropis obliqua* NPV strain A1  
6464-6664  
NC\_008586

CGCTCTATACGTACATGAGGTCACCACT **TTTT TTT GCA CTT G CAAAAA** TGACGCAATAATGTAAT  
ATATTGCCAGCATATAGTACAGT **GTAG ACT AT GCTAG TAAAATAAATAGTCTAC** GAATCGAATTTTT  
GCTCTGTATATAGGGGCAGTCTTTAAACCCAA **TTTT TTT GTTGTG CAAAAA** GACGAGATAAG  
ATTGTAAGCT

**GTAGACTATGCTAGTAAAATAGTCTAC**-DSc

**TTTT TTT GCA CTT G CAAAAA**-DSI

**TTTT TTT GTTGTG CAAAAA**-DSr

---

16. *Epiphyas postvittana* nucleopolyhedrovirus  
114611-114811  
NC\_003083

CAAACACACTCACACGTAAATATGTAATTTTTTGCACTACAAAAAAATTCAATGTGTAGTAGTG  
TATTAGGAGCGTATAGAACAGTGTAGACTATTCAAGTTAAATAGTCTACGATTTCGTAGTTTTTG  
TACTGTGTATAGGGTCTCAGAAAAAAATGAACTTTTTTTGCAGTGCAAAAAGGTTCAGTATTGCT  
TTACAGTAA

GTAGACTATTCAAGTTAAATAGTCTAC-DSc

TTTTTTGCACTACAAAAAA-DSI

TTTTTTGCAGTGCAAAAA-DSr

---

17. *Euproctis pseudoconsersa* nucleopolyhedrovirus strain Hangzhou  
5220-5419 plus  
NC\_012639

TTATCCTTTGTTTTATACAGTAGTTTTTTGTTATACAAAAAACCTCCTAAAAATGTAGTATATAG  
AGAGCATATAATGCAGTGTAGACTATTCAGGGTAAATAGTCTACGATTTGTAATTTTCCGCTGT  
ATATTTGACCTTGAAAATAAAGCAATTTTTTTGCACTACAAAAAAGTACGTGTTCAAATTGTAT  
GTGTGTG

GTAGACTATTCAGGGTAAATAGTCTAC-DSc

GTTTTTTGTTATACAAAAAAC-DSI

TTTTTTGCACTACAAAAAA-DSr

---

18. *Helicoverpa armigera* multiple nucleopolyhedrovirus  
9210-9310  
NC\_011615

ATCGGATTAGGCGATAACAAACTTTTTTGCAGTGCAAAAAAAGTCGTTATAGTGTAGTATATA  
GGAACGATATCGTACAGTGTAGACTATGCTAGTATAATAGTCTACGATTTCGAAATATTCCAC  
TGTATATTGGTGTTCGGAATAGAGGTGACTTTTTTTGCAGTGCAAAAAAGTACGTGACAAAAGC  
CACGTACAATATA

GTAGACTATGCTAGTATAATAGTCTAC-DSc

TTTTTTGCAGTGCAAAAAA-DSI

TTTTTTGCAGTGCAAAAAA-DSr

---

19. *Helicoverpa armigera* nuclear polyhedrosis virus, strain C1  
5398-5598  
NC\_003094

GACGTGATAGAGATAACGTATCACACATTTTTGTTGTGCAAAAATGTACCTATTTTTGTAGTA  
TATTGGGAGCATATCGTACAGTGTAGACTATTCTGGTTAAATAGTCTTCGATTTCGAAAATTC  
CACTGTATATTGATGACGTCATTAACACGAATTTTTTTGTAGTGCAAAAATTCAGGTTCGCT  
TCGACAACACTT

GTAGACTATTCTGGTTAAATAGTCTTC-DSc

ACATTTTTGTTGTGCAAAAATGT-DSI

GAATTTTTTTGTAGTGCAAAAATTC-DSr

---

20. *Hyphantria cunea* nucleopolyhedrovirus

7113-7317

NC\_007767

GCGGAGTACGTGACTCTCGACACGTATTTTTTGCAGTGCAAAAA GTTACTCTGTGGTA  
GTGTATTAGGAGCGTATAGAACAGTGTAGACTATTCAAGTAAAATAGTCTACGAAATGTA  
GACTTTGCTCTGTATATGGGGCTGTGTTTCGATAACGTGTTTTTTGCAGTGCAAAAA GTTC  
ATGTGTGACAAGCAAGATTATC

GTAGACTATTCAAGTAAAATAGTCTAC-DSc

TTTTTTGCAGTGCAAAAA-DSI

TTTTTTGCAGTGCAAAAA-DSr

---

21. *Leucania separata* nuclear polyhedrosis virus strain AH1

8462-8662

NC\_008348

GCTCATGGGCTGCAATCGAGCTCGACTTTTTTGCAGTGCAAAAA TGTGCTCTGTGTCGTAG  
TATATAGGTAGCATATCGTACAGTGTAGACTTTGCTAGTTAAAAGTCTTTCGAATCGAACT  
ATTCCACTGTATATAGGCTCTGATTTTTTATCGTCTTTTTTGCAGTGCAAAAA GTTCAATC  
ATCGTTGTGACGTCA

GTAGACTTTGCTAGTTAAAAGTCTTTC-DSc

TTTTTGCAGTGCAAAAA-DSI

TTTTTGCAGTGCAAAAA-DSr

---

22. *Lymantria dispar* nucleopolyhedrovirus

10008-10208

NC\_001973

CCGGCTCCGGCCAGGCCCGGACAGACTTTTTTGCAGTGCAAAAAAGCAGAGGAAATCGTA  
GTGTATGGAGAGCGTCTTCTACATCGTAGACTATGCGGGTCAATAGTCTACGATCGCAGC  
GTTTCCTCTGTATATGGGTCCTGGATTTCGGAGGCCACTTTTTTGCAGTGCAAAAA AGTGG  
GTCTGCGCCGCGGTCCGCC

ATCGTAGACTATGCGGGTCAATAGTCTACGAT-DSc

CTTTTTTGCAGTGCAAAAAAG-DSI

TTTTTTGCAGTGCAAAAA-DSr

---

23. *Lymantria xyli* MNPV isolate LyxyMNPV-5

8208-8407

NC\_013953

AGCTCCGGCCAGGCCGCAAACAGACTTTTTTGCAGTGCAAAAAAGTAAAGGAAATCGTAGTG  
TATGGAGAGCATCTTCTACATCGTAGACTATGCGGGTCAATAGTCTACGATGGAACCGTTT  
CCTCTGTATATGGGTGTCAAATTTAGAGGCTCTTTTTTGCAGTGCAAAAA GTTAATTCTA  
CCGACGCGTCCAAAC

ATCGTAGACTATGCGGGTCAATAGTCTACGAT-DSc

ACTTTTTTGCAGTGCAAAAAAGT-DSI

TTTTTTGCAGTGCAAAAA-DSr

---

**24. Malacosoma neustria NPV (Mane)**

CCTGCAGATAGGAATAGATAACGAACTTTTTTGCAGTGCAAAA TTGTGCCATATTCGTAGTG  
TATCGAGAGCATATTGTACAGTGTAGACTATGTGGCAGCATAGTCTTCGATTTCGTAGATTAGA  
TACTGTATATGGGTGCCGATAAATTCTTGA ACTTTTTGCAGTACAAAAA TTTCCATGACGCAT  
TTTGCGCGCA

GTAGACTATGTGGCAGCATAGTCTTC-DSc

TTTTGCAGTGCAAAA-DSI

TTTTTGCAGTACAAAAA-DSr

---

**25. Mamestrae brassicae MNPV  
(9190-9390)  
JQ798165**

ATCGTTATCGGATTAGGCGATAACAAAC TTTTTTGCAGTGCAAAAAA AGTCGTTATAGTGTA  
GTATATAGGAACGATATCGTACAGTGTAGACTATGCTAGTATAATAGTCTACGATTCAAAA  
TATTCCACTGTATATTGGTGTCCGATTAGAGGTGACTTTTTTGCAGTGCAAAAAA GTACGT  
GACAAAAGCCACGTAC

GTAGACTATGCTAGTATAATAGTCTAC-DSc

TTTTTGCAGTGCAAAAAA-DSI

TTTTTGCAGTGCAAAAAA-DSr

---

**26. Mamestra configurata nucleopolyhedrovirus B  
(9189-9389)  
NC\_004117**

CGTTATCGGATTAGGCGATAACGAACTTTTTTGCAGTGCAAAAAA AGTCGTTATAGTGTA  
TATAGGAACGATATCGTACAGTGTAGACTATGCTAGTATAATAGTCTACGATTTCGAAATATTC  
CATTGTATATTGGTGTCCGATTAGAGGTGACTTTTTTGCAGTGCAAAAAA GTACGTGACAAA  
AGCCACGTACAA

GTAGACTATGCTAGTATAATAGTCTAC-DSc

TTTTTGCAGTGCAAAAAA-DSI

TTTTTGCAGTGCAAAAAA-DSr

---

**27. Mamestra configurata nucleopolyhedrovirus strain 90/2  
(9010-9210)  
NC\_003529**

CAGATTAGGCGATAACGATAATGAAC TTTTTTGCAGTGCAAAAAA AGTCTCTATAGTGTA  
ATATAGGGCCATATACTACAGTGTAGACTATGCTAGTATAATAGTCTACGATTTCGAAATAT  
TCCACTGTATATCGGTGTAGGATCAGAGGTGACTTTTTTGCAGTGCAAAAAA GTACGTGCC  
GTCGGTCACGTACAA

GTAGACTATGCTAGTATAATAGTCTAC-DSc

TTTTTGCAGTGCAAAAAA-DSI

TTTTTGCAGTGCAAAAAA-DSr

---

**28. Maruca vitrata MNPV**  
107503-107703  
NC\_008725

GCAAGCAAATTCAACTTTTTGTAATGCAAAAAAGTTGATTGTGTAGTAGTATATTGGGA  
GCATATAGAACAGTGTAGACTATTCTAATAAAATAGTCTACGATTTGTAGACTTTGTACTGT  
ATATAGGGGTGCTGGCGAACGTGACTTTTTTTGCATTACAAAAAATTCATATCTGATACGA  
TCTGTTATTCAAGCGT

GTAGACTATTCTAATAAAATAGTCTAC-DSc

TCAACTTTTTGTAATGCAAAAAAGTTGA-DSI      TTTTTTTGCATTACAAAAAA-DSr

---

**29. Orgyia leucostigma NPV isolate CFS-77**  
5392-5591  
NC\_010276

GATTAGATATATTCGTATCGACTTTTTTTGTAGTGCAAAAAGTGCTTTAAATCGTAGTATAT  
TGAGAGCATATAGTACAGTGTAGACTATTCTAGTAAAATAGTCTACGATTCGTAATATTGTT  
CGGTATATGGCCCTGATATCAAACCTCGATTTTTTTTGCACTACAAAAAAGTTGACGTCTGATT  
TTCGACTTTATT

GTAGACTATTCTAGTAAAATAGTCTAC-DSc

TTTTTTGTAGTGCAAAAA-DSI      TTTTTTGCACTACAAAAAA-DSr

---

**30. Orgyia pseudotsugata multicapsid nucleopolyhedrovirus**  
(128266-128466)  
NC\_001875

GCCGGCCTACGTGACTGCCGACACGTACTTTTTTTGCACTGCAAAAAGGTTCAATGTGTGGTA  
GTGTATTTGGAGCGTATACAACGGTGTAGACTATTTATGTAAAATAGTCTACGAAACGTAG  
AGTTTGTACTATGTATGGGCCCGCGTGCAAAAGCGTGTTTTTTTGCACTGCAAAAAGTTGG  
TGGTGGGGAGGCCAC

GTAGACTATTTATGTAAAATAGTCTAC-DSc

TTTTTTGCACTGCAAAAA-DSI      TTTTTTGCACTGCAAAAA-DSr

---

**31. Plutella xylostella multiple nucleopolyhedrovirus isolate CL3**  
132723-132923  
NC\_008349

GGTGGGGAACCTTGCCAGACAAAAATGAACTTTTTGTAATGCAAAAAAGTTGATAGTGTAG  
TAGTATATTGGGAGCGTATCGTACAGTGTAGACTATTCTAATAAAATAGTCTACGATTTGTA  
GAGATTGTACTGTATATGGAGTGTGAGGCAAAAGTGAACTTTTTTGCATTGCAAAAAATTC  
ATTTAAATTTATCAT

GTAGACTATTCTAATAAAATAGTCTAC-DSc

AACTTTTTGTAATGCAAAAAAGTT-DSI      TTTTTTGCATTGCAAAAA-DSr

---

**32. Rachiplusia ou multiple nucleopolyhedrovirus**

129821-130002

NC\_004323

GGGGAAGCTTGCCAAGCAATAATGAACTTTTTGTAAATGCAAAAAAGTTGATAGTGTAGTAG  
TATATTGGGAGCGTATTGTACAGTGTAGACTATTCTAATAAAATAGTCTACGATTTGTAGAG  
TTTGTATTGTATATTGAATGCCGAGCAAAAGTGAAGCTTTTTTGCATTGCAAAAAAGTTCAATT  
TTAATTTTAAATTTT

GTAGACTATTCTAATAAAATAGTCTAC-DSc

AACTTTTTGTAAATGCAAAAAAGTT-DSI TGAAGCTTTTTTGCATTGCAAAAAAGTTCA-DSr

---

**33. Spodoptera exigua nucleopolyhedrovirus**

5848-6048

NC\_002169

TATCTTATCTGAAAATGATATTGAACTTTTTTGCACTGCAAAAAATGCACCTTAAAGTGTAGTA  
TATGGAGAGCATATTGTTCAAGTGTAGACTATGCTAGTATAATAGTCTACGATTCGAAATTTT  
CCATTGTATATCGGCCTTGAATGATGACCAACTTTTTTGCACTACAAAAAAGTACGTGACC  
GATAATCCAGATAA

GTAGACTATGCTAGTATAATAGTCTAC-DSc

TTTTTGCACTGCAAAAA-DSI

ACTTTTTTGCACTACAAAAAAGT-DSr

---

**34. Spodoptera frugiperda MNPV, strain 3AP2**

5058-5258

NC\_009011

TTAGGTTCAAGGCCTGTGCGTCATCAACTTTTTTGCAGTGCAAAAAAGTACCTTAAAGTGTAG  
TATATGGAGAGCATATTCTACAGTGTAGACTATGCTAGTATAATAGTCTACGATTCGAACTAT  
TGTTCTGTATATAGATATGCCATATCTAATCAACA TTTTTGCACTACAAAAAAGTACACTACC  
ATTTTTATCTTG

GTAGACTATGCTAGTATAATAGTCTAC-DSc

ACTTTTTTGCAGTGCAAAAAAGT-DSI TTTTTGCCTACTACAAAAA-DSr

---

**35. Spodoptera litura nucleopolyhedrovirus strain G2**

6006-6205

NC\_003102

CGGTCACGTAGGCCGCGGATGTCAACTTTTTTGCAGTGCAAAAAATATACTCTATTTTCGTAGTA  
TATAGAATCGATATATACAGTGTAGACTTTGCTAGATAAAATAGTCTACAATTTCGAAATTTTG  
TACTGTATATAGCATCCTGCCGATAGCCGAA TTTTTTGCAGTGCAAAAAAATTGATATCT  
AAATCCGGAGACG

TGTAGACTTTGCTAGATAAAATAGTCTACA-DSc

TTTTTGCAGTGCAAAAA-DSI

TTTTTTTTGCAGTGCAAAAAA-DSr

---

**36. Spodoptera litura nucleopolyhedrovirus II**

**6034-6233**

**NC\_011616**

CGATGGCCACGTGCAGGCGATAACCAACTTTTTGCAGTGCAAAAAATGTGCCCTAAAGTGTA  
GTATATGGAGAGCATATTGTTTCAGTGTAGACTATGCTAGTATAATAGTCTACGATTTCGAAAT  
TTTCCACTGTATATCGGTCTTTGTATGGAACCTAATTTTTTTGTAAGTCAAAAAAGTACATCC  
CCGATAAGGCGCC

GTAGACTATGCTAGTATAATAGTCTAC-DSc

TTTTTGCAGTGCAAAAA-DSI

TTTTTTGTAAGTCAAAAA-DSr

---

**37. Thysanoplusia orichalcea NPV isolate P2**

**130790-130990**

**JX467702**

CACGCTTACGTGCTAGGCGATATTGAGCTTTTTTGCATTGCAAAAAAGTGTGATTATGTGGTA  
GTATATTAGGAGCGTATTGTACAGTGTAGACTATTCTAATAAATAGTCTACGATTTGTAGA  
GTTTGTACTGTATATAGGGTGCCAGCCAAAATTAACTTTTTTGAATTGCAAAAAATTTCATT  
CTCAATTGTTATTC

GTAGACTATTCTAATAAATAGTCTAC-DSC

AGCTTTTTTGCATTGCAAAAAAGT -DS1

TTTTTTGAATTGCAAAAA-DS2

---

**38. Trichoplusia ni single nucleopolyhedrovirus, complete genome**

**5833-6033**

**NC\_007383**

TTATAAATTCGTTATCATCGAGGTCAA CTTTTTTGTTGTGCAAAAAAGGACTCAAAAATGTA  
GTATATTGACAGCATATTGTTTCAGTGTAGACTATTCTAGTTAAATAGTCTACGATTAGTAGT  
TTTTGTACTGTATATTGATGCCGCCCGATAACGAACTTTTTTGCACTACAAAAAA'AGACGA  
TAATACAATCTAATC

GTAGACTATTCTAGTTAAATAGTCTAC-DSc

CTTTTTGTTGTGCAAAAAAG-DSI

TTTTTTGCACTACAAAAAA-DSr
