# Supplementary material for: Identification of a Conserved Non-Protein-Coding Genomic Element that Plays an Essential Role in Alphabaculovirus Pathogenesis
Source: PubMed Central journal article supplement (PMC3989284; doi:10.1371/journal.pone.0095322), 2014-04-16
Supplement: pone.0095322.s006.pdf [file pone.0095322.s006.pdf]

**Table S1**

| SeqA | Name | Length | SeqB | Name   | Length | Score |
|------|------|--------|------|--------|--------|-------|
| 1    | Adho | 156    | 2    | Ador   | 156    | 93.0  |
| 1    | Adho | 156    | 3    | Agip   | 155    | 75.0  |
| 1    | Adho | 156    | 4    | Agse   | 155    | 78.0  |
| 1    | Adho | 156    | 5    | Anpe   | 156    | 71.0  |
| 1    | Adho | 156    | 6    | Ag     | 157    | 71.0  |
| 1    | Adho | 156    | 7    | Ac     | 156    | 77.0  |
| 1    | Adho | 156    | 8    | Apci   | 155    | 80.0  |
| 1    | Adho | 156    | 9    | Boma   | 156    | 80.0  |
| 1    | Adho | 156    | 10   | Bm     | 156    | 80.0  |
| 1    | Adho | 156    | 11   | Cf     | 155    | 76.0  |
| 1    | Adho | 156    | 12   | CfDEF  | 157    | 72.0  |
| 1    | Adho | 156    | 13   | Cc     | 156    | 80.0  |
| 1    | Adho | 156    | 14   | Clbi   | 155    | 74.0  |
| 1    | Adho | 156    | 15   | Ecob   | 156    | 74.0  |
| 1    | Adho | 156    | 16   | Eppo   | 156    | 75.0  |
| 1    | Adho | 156    | 17   | Eups   | 155    | 72.0  |
| 1    | Adho | 156    | 18   | HearM  | 155    | 78.0  |
| 1    | Adho | 156    | 19   | HearS  | 155    | 74.0  |
| 1    | Adho | 156    | 20   | Hycu   | 156    | 73.0  |
| 1    | Adho | 156    | 21   | Lese   | 156    | 74.0  |
| 1    | Adho | 156    | 22   | Ld     | 154    | 74.0  |
| 1    | Adho | 156    | 23   | Lyxy   | 154    | 74.0  |
| 1    | Adho | 156    | 24   | Mane   | 155    | 69.0  |
| 1    | Adho | 156    | 25   | Mb     | 155    | 78.0  |
| 1    | Adho | 156    | 26   | MacoB  | 155    | 78.0  |
| 1    | Adho | 156    | 27   | MacoA  | 155    | 76.0  |
| 1    | Adho | 156    | 28   | Mavi   | 156    | 77.0  |
| 1    | Adho | 156    | 29   | Orle   | 156    | 78.0  |
| 1    | Adho | 156    | 30   | Op     | 156    | 75.0  |
| 1    | Adho | 156    | 31   | Plxy   | 156    | 77.0  |
| 1    | Adho | 156    | 32   | Ro     | 156    | 74.0  |
| 1    | Adho | 156    | 33   | Se     | 155    | 78.0  |
| 1    | Adho | 156    | 34   | Sf     | 155    | 78.0  |
| 1    | Adho | 156    | 35   | SpltII | 155    | 77.0  |
| 1    | Adho | 156    | 36   | SpltG2 | 154    | 67.0  |
| 1    | Adho | 156    | 37   | Thor   | 156    | 78.0  |
| 1    | Adho | 156    | 38   | Tn     | 156    | 73.0  |
| 2    | Ador | 156    | 3    | Agip   | 155    | 77.0  |
| 2    | Ador | 156    | 4    | Agse   | 155    | 76.0  |
| 2    | Ador | 156    | 5    | Anpe   | 156    | 70.0  |
| 2    | Ador | 156    | 6    | Ag     | 157    | 70.0  |
| 2    | Ador | 156    | 7    | Ac     | 156    | 78.0  |
| 2    | Ador | 156    | 8    | Apci   | 155    | 79.0  |
| 2    | Ador | 156    | 9    | Boma   | 156    | 80.0  |
| 2    | Ador | 156    | 10   | Bm     | 156    | 80.0  |
| 2    | Ador | 156    | 11   | Cf     | 155    | 75.0  |
| 2    | Ador | 156    | 12   | CfDEF  | 157    | 69.0  |
| 2    | Ador | 156    | 13   | Cc     | 156    | 78.0  |
| 2    | Ador | 156    | 14   | Clbi   | 155    | 77.0  |
| 2    | Ador | 156    | 15   | Ecob   | 156    | 73.0  |
| 2    | Ador | 156    | 16   | Eppo   | 156    | 76.0  |
| 2    | Ador | 156    | 17   | Eups   | 155    | 75.0  |
| 2    | Ador | 156    | 18   | HearM  | 155    | 76.0  |
| 2    | Ador | 156    | 19   | HearS  | 155    | 73.0  |
| 2    | Ador | 156    | 20   | Hycu   | 156    | 73.0  |
| 2    | Ador | 156    | 21   | Lese   | 156    | 72.0  |
| 2    | Ador | 156    | 22   | Ld     | 154    | 69.0  |
| 2    | Ador | 156    | 23   | Lyxy   | 154    | 74.0  |
| 2    | Ador | 156    | 24   | Mane   | 155    | 69.0  |
| 2    | Ador | 156    | 25   | Mb     | 155    | 75.0  |
| 2    | Ador | 156    | 26   | MacoB  | 155    | 76.0  |
| 2    | Ador | 156    | 27   | MacoA  | 155    | 78.0  |
| 2    | Ador | 156    | 28   | Mavi   | 156    | 76.0  |
| 2    | Ador | 156    | 29   | Orle   | 156    | 75.0  |
| 2    | Ador | 156    | 30   | Op     | 156    | 73.0  |
| 2    | Ador | 156    | 31   | Plxy   | 156    | 78.0  |
| 2    | Ador | 156    | 32   | Ro     | 156    | 77.0  |
| 2    | Ador | 156    | 33   | Se     | 155    | 77.0  |
| 2    | Ador | 156    | 34   | Sf     | 155    | 78.0  |
| 2    | Ador | 156    | 35   | SpltII | 155    | 74.0  |
| 2    | Ador | 156    | 36   | SpltG2 | 154    | 70.0  |
| 2    | Ador | 156    | 37   | Thor   | 156    | 77.0  |
| 2    | Ador | 156    | 38   | Tn     | 156    | 75.0  |
| 3    | Agip | 155    | 4    | Agse   | 155    | 85.0  |
| 3    | Agip | 155    | 5    | Anpe   | 156    | 72.0  |
| 3    | Agip | 155    | 6    | Ag     | 157    | 74.0  |

|   |      |     |    |        |     |      |
|---|------|-----|----|--------|-----|------|
| 3 | Agip | 155 | 7  | Ac     | 156 | 78.0 |
| 3 | Agip | 155 | 8  | Apci   | 155 | 81.0 |
| 3 | Agip | 155 | 9  | Boma   | 156 | 74.0 |
| 3 | Agip | 155 | 10 | Bm     | 156 | 74.0 |
| 3 | Agip | 155 | 11 | Cf     | 155 | 81.0 |
| 3 | Agip | 155 | 12 | CfDEF  | 157 | 71.0 |
| 3 | Agip | 155 | 13 | Cc     | 156 | 79.0 |
| 3 | Agip | 155 | 14 | Clbi   | 155 | 74.0 |
| 3 | Agip | 155 | 15 | Ecob   | 156 | 77.0 |
| 3 | Agip | 155 | 16 | Eppo   | 156 | 74.0 |
| 3 | Agip | 155 | 17 | Eups   | 155 | 78.0 |
| 3 | Agip | 155 | 18 | HearM  | 155 | 83.0 |
| 3 | Agip | 155 | 19 | HearS  | 155 | 81.0 |
| 3 | Agip | 155 | 20 | Hycu   | 156 | 72.0 |
| 3 | Agip | 155 | 21 | Lese   | 156 | 79.0 |
| 3 | Agip | 155 | 22 | Ld     | 154 | 72.0 |
| 3 | Agip | 155 | 23 | Lyxy   | 154 | 77.0 |
| 3 | Agip | 155 | 24 | Mane   | 155 | 77.0 |
| 3 | Agip | 155 | 25 | Mb     | 155 | 81.0 |
| 3 | Agip | 155 | 26 | MacoB  | 155 | 81.0 |
| 3 | Agip | 155 | 27 | MacoA  | 155 | 82.0 |
| 3 | Agip | 155 | 28 | Mavi   | 156 | 75.0 |
| 3 | Agip | 155 | 29 | Orle   | 156 | 80.0 |
| 3 | Agip | 155 | 30 | Op     | 156 | 71.0 |
| 3 | Agip | 155 | 31 | Plxy   | 156 | 78.0 |
| 3 | Agip | 155 | 32 | Ro     | 156 | 78.0 |
| 3 | Agip | 155 | 33 | Se     | 155 | 89.0 |
| 3 | Agip | 155 | 34 | Sf     | 155 | 90.0 |
| 3 | Agip | 155 | 35 | SpltII | 155 | 88.0 |
| 3 | Agip | 155 | 36 | SpltG2 | 154 | 77.0 |
| 3 | Agip | 155 | 37 | Thor   | 156 | 73.0 |
| 3 | Agip | 155 | 38 | Tn     | 156 | 79.0 |
| 4 | Agse | 155 | 5  | Anpe   | 156 | 76.0 |
| 4 | Agse | 155 | 6  | Ag     | 157 | 75.0 |
| 4 | Agse | 155 | 7  | Ac     | 156 | 75.0 |
| 4 | Agse | 155 | 8  | Apci   | 155 | 81.0 |
| 4 | Agse | 155 | 9  | Boma   | 156 | 76.0 |
| 4 | Agse | 155 | 10 | Bm     | 156 | 76.0 |
| 4 | Agse | 155 | 11 | Cf     | 155 | 81.0 |
| 4 | Agse | 155 | 12 | CfDEF  | 157 | 74.0 |
| 4 | Agse | 155 | 13 | Cc     | 156 | 78.0 |
| 4 | Agse | 155 | 14 | Clbi   | 155 | 76.0 |
| 4 | Agse | 155 | 15 | Ecob   | 156 | 76.0 |
| 4 | Agse | 155 | 16 | Eppo   | 156 | 77.0 |
| 4 | Agse | 155 | 17 | Eups   | 155 | 81.0 |
| 4 | Agse | 155 | 18 | HearM  | 155 | 86.0 |
| 4 | Agse | 155 | 19 | HearS  | 155 | 72.0 |
| 4 | Agse | 155 | 20 | Hycu   | 156 | 75.0 |
| 4 | Agse | 155 | 21 | Lese   | 156 | 78.0 |
| 4 | Agse | 155 | 22 | Ld     | 154 | 74.0 |
| 4 | Agse | 155 | 23 | Lyxy   | 154 | 79.0 |
| 4 | Agse | 155 | 24 | Mane   | 155 | 77.0 |
| 4 | Agse | 155 | 25 | Mb     | 155 | 85.0 |
| 4 | Agse | 155 | 26 | MacoB  | 155 | 85.0 |
| 4 | Agse | 155 | 27 | MacoA  | 155 | 85.0 |
| 4 | Agse | 155 | 28 | Mavi   | 156 | 75.0 |
| 4 | Agse | 155 | 29 | Orle   | 156 | 81.0 |
| 4 | Agse | 155 | 30 | Op     | 156 | 74.0 |
| 4 | Agse | 155 | 31 | Plxy   | 156 | 75.0 |
| 4 | Agse | 155 | 32 | Ro     | 156 | 77.0 |
| 4 | Agse | 155 | 33 | Se     | 155 | 87.0 |
| 4 | Agse | 155 | 34 | Sf     | 155 | 83.0 |
| 4 | Agse | 155 | 35 | SpltII | 155 | 85.0 |
| 4 | Agse | 155 | 36 | SpltG2 | 154 | 75.0 |
| 4 | Agse | 155 | 37 | Thor   | 156 | 75.0 |
| 4 | Agse | 155 | 38 | Tn     | 156 | 78.0 |
| 5 | Anpe | 156 | 6  | Ag     | 157 | 79.0 |
| 5 | Anpe | 156 | 7  | Ac     | 156 | 80.0 |
| 5 | Anpe | 156 | 8  | Apci   | 155 | 70.0 |
| 5 | Anpe | 156 | 9  | Boma   | 156 | 77.0 |
| 5 | Anpe | 156 | 10 | Bm     | 156 | 77.0 |
| 5 | Anpe | 156 | 11 | Cf     | 155 | 80.0 |
| 5 | Anpe | 156 | 12 | CfDEF  | 157 | 82.0 |
| 5 | Anpe | 156 | 13 | Cc     | 156 | 76.0 |
| 5 | Anpe | 156 | 14 | Clbi   | 155 | 70.0 |
| 5 | Anpe | 156 | 15 | Ecob   | 156 | 73.0 |
| 5 | Anpe | 156 | 16 | Eppo   | 156 | 77.0 |
| 5 | Anpe | 156 | 17 | Eups   | 155 | 69.0 |
| 5 | Anpe | 156 | 18 | HearM  | 155 | 77.0 |
| 5 | Anpe | 156 | 19 | HearS  | 155 | 75.0 |

|   |      |     |    |        |     |       |
|---|------|-----|----|--------|-----|-------|
| 5 | Anpe | 156 | 20 | Hycu   | 156 | 85.0  |
| 5 | Anpe | 156 | 21 | Lese   | 156 | 73.0  |
| 5 | Anpe | 156 | 22 | Ld     | 154 | 69.0  |
| 5 | Anpe | 156 | 23 | Lyxy   | 154 | 68.0  |
| 5 | Anpe | 156 | 24 | Mane   | 155 | 76.0  |
| 5 | Anpe | 156 | 25 | Mb     | 155 | 77.0  |
| 5 | Anpe | 156 | 26 | MacoB  | 155 | 76.0  |
| 5 | Anpe | 156 | 27 | MacoA  | 155 | 74.0  |
| 5 | Anpe | 156 | 28 | Mavi   | 156 | 83.0  |
| 5 | Anpe | 156 | 29 | Orle   | 156 | 78.0  |
| 5 | Anpe | 156 | 30 | Op     | 156 | 85.0  |
| 5 | Anpe | 156 | 31 | Plxy   | 156 | 80.0  |
| 5 | Anpe | 156 | 32 | Ro     | 156 | 80.0  |
| 5 | Anpe | 156 | 33 | Se     | 155 | 74.0  |
| 5 | Anpe | 156 | 34 | Sf     | 155 | 76.0  |
| 5 | Anpe | 156 | 35 | SpltII | 155 | 74.0  |
| 5 | Anpe | 156 | 36 | SpltG2 | 154 | 70.0  |
| 5 | Anpe | 156 | 37 | Thor   | 156 | 80.0  |
| 5 | Anpe | 156 | 38 | Tn     | 156 | 74.0  |
| 6 | Ag   | 157 | 7  | Ac     | 156 | 83.0  |
| 6 | Ag   | 157 | 8  | Apci   | 155 | 71.0  |
| 6 | Ag   | 157 | 9  | Boma   | 156 | 79.0  |
| 6 | Ag   | 157 | 10 | Bm     | 156 | 79.0  |
| 6 | Ag   | 157 | 11 | Cf     | 155 | 80.0  |
| 6 | Ag   | 157 | 12 | CfDEF  | 157 | 92.0  |
| 6 | Ag   | 157 | 13 | Cc     | 156 | 76.0  |
| 6 | Ag   | 157 | 14 | Clbi   | 155 | 71.0  |
| 6 | Ag   | 157 | 15 | Ecob   | 156 | 69.0  |
| 6 | Ag   | 157 | 16 | Eppo   | 156 | 83.0  |
| 6 | Ag   | 157 | 17 | Eups   | 155 | 70.0  |
| 6 | Ag   | 157 | 18 | HearM  | 155 | 77.0  |
| 6 | Ag   | 157 | 19 | HearS  | 155 | 73.0  |
| 6 | Ag   | 157 | 20 | Hycu   | 156 | 82.0  |
| 6 | Ag   | 157 | 21 | Lese   | 156 | 71.0  |
| 6 | Ag   | 157 | 22 | Ld     | 154 | 72.0  |
| 6 | Ag   | 157 | 23 | Lyxy   | 154 | 73.0  |
| 6 | Ag   | 157 | 24 | Mane   | 155 | 72.0  |
| 6 | Ag   | 157 | 25 | Mb     | 155 | 77.0  |
| 6 | Ag   | 157 | 26 | MacoB  | 155 | 78.0  |
| 6 | Ag   | 157 | 27 | MacoA  | 155 | 79.0  |
| 6 | Ag   | 157 | 28 | Mavi   | 156 | 80.0  |
| 6 | Ag   | 157 | 29 | Orle   | 156 | 75.0  |
| 6 | Ag   | 157 | 30 | Op     | 156 | 83.0  |
| 6 | Ag   | 157 | 31 | Plxy   | 156 | 83.0  |
| 6 | Ag   | 157 | 32 | Ro     | 156 | 80.0  |
| 6 | Ag   | 157 | 33 | Se     | 155 | 73.0  |
| 6 | Ag   | 157 | 34 | Sf     | 155 | 78.0  |
| 6 | Ag   | 157 | 35 | SpltII | 155 | 74.0  |
| 6 | Ag   | 157 | 36 | SpltG2 | 154 | 72.0  |
| 6 | Ag   | 157 | 37 | Thor   | 156 | 80.0  |
| 6 | Ag   | 157 | 38 | Tn     | 156 | 72.0  |
| 7 | Ac   | 156 | 8  | Apci   | 155 | 78.0  |
| 7 | Ac   | 156 | 9  | Boma   | 156 | 91.0  |
| 7 | Ac   | 156 | 10 | Bm     | 156 | 91.0  |
| 7 | Ac   | 156 | 11 | Cf     | 155 | 73.0  |
| 7 | Ac   | 156 | 12 | CfDEF  | 157 | 80.0  |
| 7 | Ac   | 156 | 13 | Cc     | 156 | 76.0  |
| 7 | Ac   | 156 | 14 | Clbi   | 155 | 81.0  |
| 7 | Ac   | 156 | 15 | Ecob   | 156 | 73.0  |
| 7 | Ac   | 156 | 16 | Eppo   | 156 | 80.0  |
| 7 | Ac   | 156 | 17 | Eups   | 155 | 72.0  |
| 7 | Ac   | 156 | 18 | HearM  | 155 | 83.0  |
| 7 | Ac   | 156 | 19 | HearS  | 155 | 76.0  |
| 7 | Ac   | 156 | 20 | Hycu   | 156 | 78.0  |
| 7 | Ac   | 156 | 21 | Lese   | 156 | 69.0  |
| 7 | Ac   | 156 | 22 | Ld     | 154 | 72.0  |
| 7 | Ac   | 156 | 23 | Lyxy   | 154 | 72.0  |
| 7 | Ac   | 156 | 24 | Mane   | 155 | 76.0  |
| 7 | Ac   | 156 | 25 | Mb     | 155 | 81.0  |
| 7 | Ac   | 156 | 26 | MacoB  | 155 | 81.0  |
| 7 | Ac   | 156 | 27 | MacoA  | 155 | 81.0  |
| 7 | Ac   | 156 | 28 | Mavi   | 156 | 91.0  |
| 7 | Ac   | 156 | 29 | Orle   | 156 | 78.0  |
| 7 | Ac   | 156 | 30 | Op     | 156 | 80.0  |
| 7 | Ac   | 156 | 31 | Plxy   | 156 | 100.0 |
| 7 | Ac   | 156 | 32 | Ro     | 156 | 94.0  |
| 7 | Ac   | 156 | 33 | Se     | 155 | 76.0  |
| 7 | Ac   | 156 | 34 | Sf     | 155 | 77.0  |
| 7 | Ac   | 156 | 35 | SpltII | 155 | 76.0  |
| 7 | Ac   | 156 | 36 | SpltG2 | 154 | 74.0  |

|    |      |     |    |        |     |       |
|----|------|-----|----|--------|-----|-------|
| 7  | Ac   | 156 | 37 | Thor   | 156 | 89.0  |
| 7  | Ac   | 156 | 38 | Tn     | 156 | 78.0  |
| 8  | Apci | 155 | 9  | Boma   | 156 | 75.0  |
| 8  | Apci | 155 | 10 | Bm     | 156 | 75.0  |
| 8  | Apci | 155 | 11 | Cf     | 155 | 76.0  |
| 8  | Apci | 155 | 12 | CfDEF  | 157 | 72.0  |
| 8  | Apci | 155 | 13 | Cc     | 156 | 75.0  |
| 8  | Apci | 155 | 14 | Clbi   | 155 | 75.0  |
| 8  | Apci | 155 | 15 | Ecob   | 156 | 80.0  |
| 8  | Apci | 155 | 16 | Eppo   | 156 | 72.0  |
| 8  | Apci | 155 | 17 | Eups   | 155 | 71.0  |
| 8  | Apci | 155 | 18 | HearM  | 155 | 78.0  |
| 8  | Apci | 155 | 19 | HearS  | 155 | 78.0  |
| 8  | Apci | 155 | 20 | Hycu   | 156 | 72.0  |
| 8  | Apci | 155 | 21 | Lese   | 156 | 75.0  |
| 8  | Apci | 155 | 22 | Ld     | 154 | 72.0  |
| 8  | Apci | 155 | 23 | Lyxy   | 154 | 75.0  |
| 8  | Apci | 155 | 24 | Mane   | 155 | 75.0  |
| 8  | Apci | 155 | 25 | Mb     | 155 | 76.0  |
| 8  | Apci | 155 | 26 | MacoB  | 155 | 76.0  |
| 8  | Apci | 155 | 27 | MacoA  | 155 | 78.0  |
| 8  | Apci | 155 | 28 | Mavi   | 156 | 74.0  |
| 8  | Apci | 155 | 29 | Orle   | 156 | 78.0  |
| 8  | Apci | 155 | 30 | Op     | 156 | 74.0  |
| 8  | Apci | 155 | 31 | Plxy   | 156 | 77.0  |
| 8  | Apci | 155 | 32 | Ro     | 156 | 74.0  |
| 8  | Apci | 155 | 33 | Se     | 155 | 80.0  |
| 8  | Apci | 155 | 34 | Sf     | 155 | 77.0  |
| 8  | Apci | 155 | 35 | SpltII | 155 | 81.0  |
| 8  | Apci | 155 | 36 | SpltG2 | 154 | 74.0  |
| 8  | Apci | 155 | 37 | Thor   | 156 | 78.0  |
| 8  | Apci | 155 | 38 | Tn     | 156 | 75.0  |
| 9  | Boma | 156 | 10 | Bm     | 156 | 100.0 |
| 9  | Boma | 156 | 11 | Cf     | 155 | 71.0  |
| 9  | Boma | 156 | 12 | CfDEF  | 157 | 79.0  |
| 9  | Boma | 156 | 13 | Cc     | 156 | 81.0  |
| 9  | Boma | 156 | 14 | Clbi   | 155 | 77.0  |
| 9  | Boma | 156 | 15 | Ecob   | 156 | 73.0  |
| 9  | Boma | 156 | 16 | Eppo   | 156 | 78.0  |
| 9  | Boma | 156 | 17 | Eups   | 155 | 76.0  |
| 9  | Boma | 156 | 18 | HearM  | 155 | 80.0  |
| 9  | Boma | 156 | 19 | HearS  | 155 | 80.0  |
| 9  | Boma | 156 | 20 | Hycu   | 156 | 75.0  |
| 9  | Boma | 156 | 21 | Lese   | 156 | 69.0  |
| 9  | Boma | 156 | 22 | Ld     | 154 | 74.0  |
| 9  | Boma | 156 | 23 | Lyxy   | 154 | 73.0  |
| 9  | Boma | 156 | 24 | Mane   | 155 | 73.0  |
| 9  | Boma | 156 | 25 | Mb     | 155 | 76.0  |
| 9  | Boma | 156 | 26 | MacoB  | 155 | 76.0  |
| 9  | Boma | 156 | 27 | MacoA  | 155 | 78.0  |
| 9  | Boma | 156 | 28 | Mavi   | 156 | 85.0  |
| 9  | Boma | 156 | 29 | Orle   | 156 | 80.0  |
| 9  | Boma | 156 | 30 | Op     | 156 | 75.0  |
| 9  | Boma | 156 | 31 | Plxy   | 156 | 91.0  |
| 9  | Boma | 156 | 32 | Ro     | 156 | 91.0  |
| 9  | Boma | 156 | 33 | Se     | 155 | 74.0  |
| 9  | Boma | 156 | 34 | Sf     | 155 | 76.0  |
| 9  | Boma | 156 | 35 | SpltII | 155 | 76.0  |
| 9  | Boma | 156 | 36 | SpltG2 | 154 | 76.0  |
| 9  | Boma | 156 | 37 | Thor   | 156 | 85.0  |
| 9  | Boma | 156 | 38 | Tn     | 156 | 77.0  |
| 10 | Bm   | 156 | 11 | Cf     | 155 | 71.0  |
| 10 | Bm   | 156 | 12 | CfDEF  | 157 | 79.0  |
| 10 | Bm   | 156 | 13 | Cc     | 156 | 81.0  |
| 10 | Bm   | 156 | 14 | Clbi   | 155 | 77.0  |
| 10 | Bm   | 156 | 15 | Ecob   | 156 | 73.0  |
| 10 | Bm   | 156 | 16 | Eppo   | 156 | 78.0  |
| 10 | Bm   | 156 | 17 | Eups   | 155 | 76.0  |
| 10 | Bm   | 156 | 18 | HearM  | 155 | 80.0  |
| 10 | Bm   | 156 | 19 | HearS  | 155 | 80.0  |
| 10 | Bm   | 156 | 20 | Hycu   | 156 | 75.0  |
| 10 | Bm   | 156 | 21 | Lese   | 156 | 69.0  |
| 10 | Bm   | 156 | 22 | Ld     | 154 | 74.0  |
| 10 | Bm   | 156 | 23 | Lyxy   | 154 | 73.0  |
| 10 | Bm   | 156 | 24 | Mane   | 155 | 73.0  |
| 10 | Bm   | 156 | 25 | Mb     | 155 | 76.0  |
| 10 | Bm   | 156 | 26 | MacoB  | 155 | 76.0  |
| 10 | Bm   | 156 | 27 | MacoA  | 155 | 78.0  |
| 10 | Bm   | 156 | 28 | Mavi   | 156 | 85.0  |
| 10 | Bm   | 156 | 29 | Orle   | 156 | 80.0  |

|    |       |     |    |        |     |      |
|----|-------|-----|----|--------|-----|------|
| 10 | Bm    | 156 | 30 | Op     | 156 | 75.0 |
| 10 | Bm    | 156 | 31 | Plxy   | 156 | 91.0 |
| 10 | Bm    | 156 | 32 | Ro     | 156 | 91.0 |
| 10 | Bm    | 156 | 33 | Se     | 155 | 74.0 |
| 10 | Bm    | 156 | 34 | Sf     | 155 | 76.0 |
| 10 | Bm    | 156 | 35 | SpltII | 155 | 76.0 |
| 10 | Bm    | 156 | 36 | SpltG2 | 154 | 76.0 |
| 10 | Bm    | 156 | 37 | Thor   | 156 | 85.0 |
| 10 | Bm    | 156 | 38 | Tn     | 156 | 77.0 |
| 11 | Cf    | 155 | 12 | CfDEF  | 157 | 81.0 |
| 11 | Cf    | 155 | 13 | Cc     | 156 | 77.0 |
| 11 | Cf    | 155 | 14 | Clbi   | 155 | 74.0 |
| 11 | Cf    | 155 | 15 | Ecob   | 156 | 74.0 |
| 11 | Cf    | 155 | 16 | Eppo   | 156 | 78.0 |
| 11 | Cf    | 155 | 17 | Eups   | 155 | 74.0 |
| 11 | Cf    | 155 | 18 | HearM  | 155 | 74.0 |
| 11 | Cf    | 155 | 19 | HearS  | 155 | 73.0 |
| 11 | Cf    | 155 | 20 | Hycu   | 156 | 82.0 |
| 11 | Cf    | 155 | 21 | Lese   | 156 | 73.0 |
| 11 | Cf    | 155 | 22 | Ld     | 154 | 71.0 |
| 11 | Cf    | 155 | 23 | Lyxy   | 154 | 75.0 |
| 11 | Cf    | 155 | 24 | Mane   | 155 | 76.0 |
| 11 | Cf    | 155 | 25 | Mb     | 155 | 74.0 |
| 11 | Cf    | 155 | 26 | MacoB  | 155 | 74.0 |
| 11 | Cf    | 155 | 27 | MacoA  | 155 | 75.0 |
| 11 | Cf    | 155 | 28 | Mavi   | 156 | 78.0 |
| 11 | Cf    | 155 | 29 | Orle   | 156 | 80.0 |
| 11 | Cf    | 155 | 30 | Op     | 156 | 80.0 |
| 11 | Cf    | 155 | 31 | Plxy   | 156 | 72.0 |
| 11 | Cf    | 155 | 32 | Ro     | 156 | 73.0 |
| 11 | Cf    | 155 | 33 | Se     | 155 | 80.0 |
| 11 | Cf    | 155 | 34 | Sf     | 155 | 82.0 |
| 11 | Cf    | 155 | 35 | SpltII | 155 | 79.0 |
| 11 | Cf    | 155 | 36 | SpltG2 | 154 | 74.0 |
| 11 | Cf    | 155 | 37 | Thor   | 156 | 78.0 |
| 11 | Cf    | 155 | 38 | Tn     | 156 | 74.0 |
| 12 | CfDEF | 157 | 13 | Cc     | 156 | 75.0 |
| 12 | CfDEF | 157 | 14 | Clbi   | 155 | 73.0 |
| 12 | CfDEF | 157 | 15 | Ecob   | 156 | 68.0 |
| 12 | CfDEF | 157 | 16 | Eppo   | 156 | 84.0 |
| 12 | CfDEF | 157 | 17 | Eups   | 155 | 69.0 |
| 12 | CfDEF | 157 | 18 | HearM  | 155 | 72.0 |
| 12 | CfDEF | 157 | 19 | HearS  | 155 | 72.0 |
| 12 | CfDEF | 157 | 20 | Hycu   | 156 | 83.0 |
| 12 | CfDEF | 157 | 21 | Lese   | 156 | 71.0 |
| 12 | CfDEF | 157 | 22 | Ld     | 154 | 70.0 |
| 12 | CfDEF | 157 | 23 | Lyxy   | 154 | 73.0 |
| 12 | CfDEF | 157 | 24 | Mane   | 155 | 76.0 |
| 12 | CfDEF | 157 | 25 | Mb     | 155 | 72.0 |
| 12 | CfDEF | 157 | 26 | MacoB  | 155 | 72.0 |
| 12 | CfDEF | 157 | 27 | MacoA  | 155 | 78.0 |
| 12 | CfDEF | 157 | 28 | Mavi   | 156 | 79.0 |
| 12 | CfDEF | 157 | 29 | Orle   | 156 | 75.0 |
| 12 | CfDEF | 157 | 30 | Op     | 156 | 83.0 |
| 12 | CfDEF | 157 | 31 | Plxy   | 156 | 80.0 |
| 12 | CfDEF | 157 | 32 | Ro     | 156 | 83.0 |
| 12 | CfDEF | 157 | 33 | Se     | 155 | 71.0 |
| 12 | CfDEF | 157 | 34 | Sf     | 155 | 78.0 |
| 12 | CfDEF | 157 | 35 | SpltII | 155 | 70.0 |
| 12 | CfDEF | 157 | 36 | SpltG2 | 154 | 71.0 |
| 12 | CfDEF | 157 | 37 | Thor   | 156 | 80.0 |
| 12 | CfDEF | 157 | 38 | Tn     | 156 | 72.0 |
| 13 | Cc    | 156 | 14 | Clbi   | 155 | 76.0 |
| 13 | Cc    | 156 | 15 | Ecob   | 156 | 76.0 |
| 13 | Cc    | 156 | 16 | Eppo   | 156 | 77.0 |
| 13 | Cc    | 156 | 17 | Eups   | 155 | 78.0 |
| 13 | Cc    | 156 | 18 | HearM  | 155 | 79.0 |
| 13 | Cc    | 156 | 19 | HearS  | 155 | 83.0 |
| 13 | Cc    | 156 | 20 | Hycu   | 156 | 78.0 |
| 13 | Cc    | 156 | 21 | Lese   | 156 | 71.0 |
| 13 | Cc    | 156 | 22 | Ld     | 154 | 74.0 |
| 13 | Cc    | 156 | 23 | Lyxy   | 154 | 74.0 |
| 13 | Cc    | 156 | 24 | Mane   | 155 | 74.0 |
| 13 | Cc    | 156 | 25 | Mb     | 155 | 79.0 |
| 13 | Cc    | 156 | 26 | MacoB  | 155 | 78.0 |
| 13 | Cc    | 156 | 27 | MacoA  | 155 | 80.0 |
| 13 | Cc    | 156 | 28 | Mavi   | 156 | 80.0 |
| 13 | Cc    | 156 | 29 | Orle   | 156 | 81.0 |
| 13 | Cc    | 156 | 30 | Op     | 156 | 75.0 |
| 13 | Cc    | 156 | 31 | Plxy   | 156 | 76.0 |

|    |      |     |    |        |     |      |
|----|------|-----|----|--------|-----|------|
| 13 | Cc   | 156 | 32 | Ro     | 156 | 81.0 |
| 13 | Cc   | 156 | 33 | Se     | 155 | 80.0 |
| 13 | Cc   | 156 | 34 | Sf     | 155 | 81.0 |
| 13 | Cc   | 156 | 35 | SpltII | 155 | 78.0 |
| 13 | Cc   | 156 | 36 | SpltG2 | 154 | 79.0 |
| 13 | Cc   | 156 | 37 | Thor   | 156 | 80.0 |
| 13 | Cc   | 156 | 38 | Tn     | 156 | 90.0 |
| 14 | Clbi | 155 | 15 | Ecob   | 156 | 72.0 |
| 14 | Clbi | 155 | 16 | Eppo   | 156 | 72.0 |
| 14 | Clbi | 155 | 17 | Eups   | 155 | 78.0 |
| 14 | Clbi | 155 | 18 | HearM  | 155 | 81.0 |
| 14 | Clbi | 155 | 19 | HearS  | 155 | 77.0 |
| 14 | Clbi | 155 | 20 | Hycu   | 156 | 69.0 |
| 14 | Clbi | 155 | 21 | Lese   | 156 | 69.0 |
| 14 | Clbi | 155 | 22 | Ld     | 154 | 68.0 |
| 14 | Clbi | 155 | 23 | Lyxy   | 154 | 74.0 |
| 14 | Clbi | 155 | 24 | Mane   | 155 | 69.0 |
| 14 | Clbi | 155 | 25 | Mb     | 155 | 80.0 |
| 14 | Clbi | 155 | 26 | MacoB  | 155 | 81.0 |
| 14 | Clbi | 155 | 27 | MacoA  | 155 | 79.0 |
| 14 | Clbi | 155 | 28 | Mavi   | 156 | 76.0 |
| 14 | Clbi | 155 | 29 | Orle   | 156 | 76.0 |
| 14 | Clbi | 155 | 30 | Op     | 156 | 69.0 |
| 14 | Clbi | 155 | 31 | Plxy   | 156 | 81.0 |
| 14 | Clbi | 155 | 32 | Ro     | 156 | 79.0 |
| 14 | Clbi | 155 | 33 | Se     | 155 | 79.0 |
| 14 | Clbi | 155 | 34 | Sf     | 155 | 79.0 |
| 14 | Clbi | 155 | 35 | SpltII | 155 | 74.0 |
| 14 | Clbi | 155 | 36 | SpltG2 | 154 | 75.0 |
| 14 | Clbi | 155 | 37 | Thor   | 156 | 74.0 |
| 14 | Clbi | 155 | 38 | Tn     | 156 | 73.0 |
| 15 | Ecob | 156 | 16 | Eppo   | 156 | 75.0 |
| 15 | Ecob | 156 | 17 | Eups   | 155 | 71.0 |
| 15 | Ecob | 156 | 18 | HearM  | 155 | 73.0 |
| 15 | Ecob | 156 | 19 | HearS  | 155 | 78.0 |
| 15 | Ecob | 156 | 20 | Hycu   | 156 | 75.0 |
| 15 | Ecob | 156 | 21 | Lese   | 156 | 73.0 |
| 15 | Ecob | 156 | 22 | Ld     | 154 | 71.0 |
| 15 | Ecob | 156 | 23 | Lyxy   | 154 | 71.0 |
| 15 | Ecob | 156 | 24 | Mane   | 155 | 70.0 |
| 15 | Ecob | 156 | 25 | Mb     | 155 | 72.0 |
| 15 | Ecob | 156 | 26 | MacoB  | 155 | 72.0 |
| 15 | Ecob | 156 | 27 | MacoA  | 155 | 77.0 |
| 15 | Ecob | 156 | 28 | Mavi   | 156 | 72.0 |
| 15 | Ecob | 156 | 29 | Orle   | 156 | 79.0 |
| 15 | Ecob | 156 | 30 | Op     | 156 | 70.0 |
| 15 | Ecob | 156 | 31 | Plxy   | 156 | 73.0 |
| 15 | Ecob | 156 | 32 | Ro     | 156 | 71.0 |
| 15 | Ecob | 156 | 33 | Se     | 155 | 77.0 |
| 15 | Ecob | 156 | 34 | Sf     | 155 | 76.0 |
| 15 | Ecob | 156 | 35 | SpltII | 155 | 80.0 |
| 15 | Ecob | 156 | 36 | SpltG2 | 154 | 77.0 |
| 15 | Ecob | 156 | 37 | Thor   | 156 | 75.0 |
| 15 | Ecob | 156 | 38 | Tn     | 156 | 78.0 |
| 16 | Eppo | 156 | 17 | Eups   | 155 | 77.0 |
| 16 | Eppo | 156 | 18 | HearM  | 155 | 78.0 |
| 16 | Eppo | 156 | 19 | HearS  | 155 | 72.0 |
| 16 | Eppo | 156 | 20 | Hycu   | 156 | 81.0 |
| 16 | Eppo | 156 | 21 | Lese   | 156 | 70.0 |
| 16 | Eppo | 156 | 22 | Ld     | 154 | 71.0 |
| 16 | Eppo | 156 | 23 | Lyxy   | 154 | 72.0 |
| 16 | Eppo | 156 | 24 | Mane   | 155 | 71.0 |
| 16 | Eppo | 156 | 25 | Mb     | 155 | 76.0 |
| 16 | Eppo | 156 | 26 | MacoB  | 155 | 77.0 |
| 16 | Eppo | 156 | 27 | MacoA  | 155 | 74.0 |
| 16 | Eppo | 156 | 28 | Mavi   | 156 | 78.0 |
| 16 | Eppo | 156 | 29 | Orle   | 156 | 72.0 |
| 16 | Eppo | 156 | 30 | Op     | 156 | 81.0 |
| 16 | Eppo | 156 | 31 | Plxy   | 156 | 80.0 |
| 16 | Eppo | 156 | 32 | Ro     | 156 | 79.0 |
| 16 | Eppo | 156 | 33 | Se     | 155 | 73.0 |
| 16 | Eppo | 156 | 34 | Sf     | 155 | 73.0 |
| 16 | Eppo | 156 | 35 | SpltII | 155 | 72.0 |
| 16 | Eppo | 156 | 36 | SpltG2 | 154 | 70.0 |
| 16 | Eppo | 156 | 37 | Thor   | 156 | 80.0 |
| 16 | Eppo | 156 | 38 | Tn     | 156 | 75.0 |
| 17 | Eups | 155 | 18 | HearM  | 155 | 73.0 |
| 17 | Eups | 155 | 19 | HearS  | 155 | 76.0 |
| 17 | Eups | 155 | 20 | Hycu   | 156 | 72.0 |
| 17 | Eups | 155 | 21 | Lese   | 156 | 68.0 |

|    |       |     |    |        |     |      |
|----|-------|-----|----|--------|-----|------|
| 17 | Eups  | 155 | 22 | Ld     | 154 | 70.0 |
| 17 | Eups  | 155 | 23 | Lyxy   | 154 | 75.0 |
| 17 | Eups  | 155 | 24 | Mane   | 155 | 68.0 |
| 17 | Eups  | 155 | 25 | Mb     | 155 | 72.0 |
| 17 | Eups  | 155 | 26 | MacoB  | 155 | 72.0 |
| 17 | Eups  | 155 | 27 | MacoA  | 155 | 74.0 |
| 17 | Eups  | 155 | 28 | Mavi   | 156 | 71.0 |
| 17 | Eups  | 155 | 29 | Orle   | 156 | 79.0 |
| 17 | Eups  | 155 | 30 | Op     | 156 | 67.0 |
| 17 | Eups  | 155 | 31 | Plxy   | 156 | 72.0 |
| 17 | Eups  | 155 | 32 | Ro     | 156 | 72.0 |
| 17 | Eups  | 155 | 33 | Se     | 155 | 81.0 |
| 17 | Eups  | 155 | 34 | Sf     | 155 | 76.0 |
| 17 | Eups  | 155 | 35 | SpltII | 155 | 77.0 |
| 17 | Eups  | 155 | 36 | SpltG2 | 154 | 70.0 |
| 17 | Eups  | 155 | 37 | Thor   | 156 | 72.0 |
| 17 | Eups  | 155 | 38 | Tn     | 156 | 81.0 |
| 18 | HearM | 155 | 19 | HearS  | 155 | 76.0 |
| 18 | HearM | 155 | 20 | Hycu   | 156 | 79.0 |
| 18 | HearM | 155 | 21 | Lese   | 156 | 75.0 |
| 18 | HearM | 155 | 22 | Ld     | 154 | 72.0 |
| 18 | HearM | 155 | 23 | Lyxy   | 154 | 79.0 |
| 18 | HearM | 155 | 24 | Mane   | 155 | 75.0 |
| 18 | HearM | 155 | 25 | Mb     | 155 | 98.0 |
| 18 | HearM | 155 | 26 | MacoB  | 155 | 98.0 |
| 18 | HearM | 155 | 27 | MacoA  | 155 | 92.0 |
| 18 | HearM | 155 | 28 | Mavi   | 156 | 79.0 |
| 18 | HearM | 155 | 29 | Orle   | 156 | 78.0 |
| 18 | HearM | 155 | 30 | Op     | 156 | 73.0 |
| 18 | HearM | 155 | 31 | Plxy   | 156 | 83.0 |
| 18 | HearM | 155 | 32 | Ro     | 156 | 78.0 |
| 18 | HearM | 155 | 33 | Se     | 155 | 84.0 |
| 18 | HearM | 155 | 34 | Sf     | 155 | 80.0 |
| 18 | HearM | 155 | 35 | SpltII | 155 | 83.0 |
| 18 | HearM | 155 | 36 | SpltG2 | 154 | 79.0 |
| 18 | HearM | 155 | 37 | Thor   | 156 | 77.0 |
| 18 | HearM | 155 | 38 | Tn     | 156 | 72.0 |
| 19 | HearS | 155 | 20 | Hycu   | 156 | 71.0 |
| 19 | HearS | 155 | 21 | Lese   | 156 | 76.0 |
| 19 | HearS | 155 | 22 | Ld     | 154 | 68.0 |
| 19 | HearS | 155 | 23 | Lyxy   | 154 | 73.0 |
| 19 | HearS | 155 | 24 | Mane   | 155 | 77.0 |
| 19 | HearS | 155 | 25 | Mb     | 155 | 78.0 |
| 19 | HearS | 155 | 26 | MacoB  | 155 | 77.0 |
| 19 | HearS | 155 | 27 | MacoA  | 155 | 76.0 |
| 19 | HearS | 155 | 28 | Mavi   | 156 | 76.0 |
| 19 | HearS | 155 | 29 | Orle   | 156 | 79.0 |
| 19 | HearS | 155 | 30 | Op     | 156 | 73.0 |
| 19 | HearS | 155 | 31 | Plxy   | 156 | 76.0 |
| 19 | HearS | 155 | 32 | Ro     | 156 | 76.0 |
| 19 | HearS | 155 | 33 | Se     | 155 | 76.0 |
| 19 | HearS | 155 | 34 | Sf     | 155 | 76.0 |
| 19 | HearS | 155 | 35 | SpltII | 155 | 80.0 |
| 19 | HearS | 155 | 36 | SpltG2 | 154 | 76.0 |
| 19 | HearS | 155 | 37 | Thor   | 156 | 73.0 |
| 19 | HearS | 155 | 38 | Tn     | 156 | 78.0 |
| 20 | Hycu  | 156 | 21 | Lese   | 156 | 79.0 |
| 20 | Hycu  | 156 | 22 | Ld     | 154 | 73.0 |
| 20 | Hycu  | 156 | 23 | Lyxy   | 154 | 72.0 |
| 20 | Hycu  | 156 | 24 | Mane   | 155 | 71.0 |
| 20 | Hycu  | 156 | 25 | Mb     | 155 | 78.0 |
| 20 | Hycu  | 156 | 26 | MacoB  | 155 | 77.0 |
| 20 | Hycu  | 156 | 27 | MacoA  | 155 | 78.0 |
| 20 | Hycu  | 156 | 28 | Mavi   | 156 | 83.0 |
| 20 | Hycu  | 156 | 29 | Orle   | 156 | 78.0 |
| 20 | Hycu  | 156 | 30 | Op     | 156 | 84.0 |
| 20 | Hycu  | 156 | 31 | Plxy   | 156 | 78.0 |
| 20 | Hycu  | 156 | 32 | Ro     | 156 | 76.0 |
| 20 | Hycu  | 156 | 33 | Se     | 155 | 74.0 |
| 20 | Hycu  | 156 | 34 | Sf     | 155 | 75.0 |
| 20 | Hycu  | 156 | 35 | SpltII | 155 | 75.0 |
| 20 | Hycu  | 156 | 36 | SpltG2 | 154 | 75.0 |
| 20 | Hycu  | 156 | 37 | Thor   | 156 | 80.0 |
| 20 | Hycu  | 156 | 38 | Tn     | 156 | 73.0 |
| 21 | Lese  | 156 | 22 | Ld     | 154 | 70.0 |
| 21 | Lese  | 156 | 23 | Lyxy   | 154 | 71.0 |
| 21 | Lese  | 156 | 24 | Mane   | 155 | 70.0 |
| 21 | Lese  | 156 | 25 | Mb     | 155 | 76.0 |
| 21 | Lese  | 156 | 26 | MacoB  | 155 | 76.0 |
| 21 | Lese  | 156 | 27 | MacoA  | 155 | 80.0 |

|    |       |     |    |        |     |      |
|----|-------|-----|----|--------|-----|------|
| 21 | Lese  | 156 | 28 | Mavi   | 156 | 75.0 |
| 21 | Lese  | 156 | 29 | Orle   | 156 | 80.0 |
| 21 | Lese  | 156 | 30 | Op     | 156 | 72.0 |
| 21 | Lese  | 156 | 31 | Plxy   | 156 | 69.0 |
| 21 | Lese  | 156 | 32 | Ro     | 156 | 67.0 |
| 21 | Lese  | 156 | 33 | Se     | 155 | 74.0 |
| 21 | Lese  | 156 | 34 | Sf     | 155 | 76.0 |
| 21 | Lese  | 156 | 35 | SpltII | 155 | 80.0 |
| 21 | Lese  | 156 | 36 | SpltG2 | 154 | 74.0 |
| 21 | Lese  | 156 | 37 | Thor   | 156 | 69.0 |
| 21 | Lese  | 156 | 38 | Tn     | 156 | 72.0 |
| 22 | Ld    | 154 | 23 | Lyxy   | 154 | 86.0 |
| 22 | Ld    | 154 | 24 | Mane   | 155 | 70.0 |
| 22 | Ld    | 154 | 25 | Mb     | 155 | 73.0 |
| 22 | Ld    | 154 | 26 | MacoB  | 155 | 72.0 |
| 22 | Ld    | 154 | 27 | MacoA  | 155 | 72.0 |
| 22 | Ld    | 154 | 28 | Mavi   | 156 | 72.0 |
| 22 | Ld    | 154 | 29 | Orle   | 156 | 70.0 |
| 22 | Ld    | 154 | 30 | Op     | 156 | 70.0 |
| 22 | Ld    | 154 | 31 | Plxy   | 156 | 72.0 |
| 22 | Ld    | 154 | 32 | Ro     | 156 | 72.0 |
| 22 | Ld    | 154 | 33 | Se     | 155 | 76.0 |
| 22 | Ld    | 154 | 34 | Sf     | 155 | 73.0 |
| 22 | Ld    | 154 | 35 | SpltII | 155 | 75.0 |
| 22 | Ld    | 154 | 36 | SpltG2 | 154 | 72.0 |
| 22 | Ld    | 154 | 37 | Thor   | 156 | 71.0 |
| 22 | Ld    | 154 | 38 | Tn     | 156 | 70.0 |
| 23 | Lyxy  | 154 | 24 | Mane   | 155 | 74.0 |
| 23 | Lyxy  | 154 | 25 | Mb     | 155 | 77.0 |
| 23 | Lyxy  | 154 | 26 | MacoB  | 155 | 78.0 |
| 23 | Lyxy  | 154 | 27 | MacoA  | 155 | 76.0 |
| 23 | Lyxy  | 154 | 28 | Mavi   | 156 | 68.0 |
| 23 | Lyxy  | 154 | 29 | Orle   | 156 | 75.0 |
| 23 | Lyxy  | 154 | 30 | Op     | 156 | 73.0 |
| 23 | Lyxy  | 154 | 31 | Plxy   | 156 | 73.0 |
| 23 | Lyxy  | 154 | 32 | Ro     | 156 | 71.0 |
| 23 | Lyxy  | 154 | 33 | Se     | 155 | 74.0 |
| 23 | Lyxy  | 154 | 34 | Sf     | 155 | 79.0 |
| 23 | Lyxy  | 154 | 35 | SpltII | 155 | 76.0 |
| 23 | Lyxy  | 154 | 36 | SpltG2 | 154 | 69.0 |
| 23 | Lyxy  | 154 | 37 | Thor   | 156 | 73.0 |
| 23 | Lyxy  | 154 | 38 | Tn     | 156 | 74.0 |
| 24 | Mane  | 155 | 25 | Mb     | 155 | 74.0 |
| 24 | Mane  | 155 | 26 | MacoB  | 155 | 75.0 |
| 24 | Mane  | 155 | 27 | MacoA  | 155 | 70.0 |
| 24 | Mane  | 155 | 28 | Mavi   | 156 | 74.0 |
| 24 | Mane  | 155 | 29 | Orle   | 156 | 76.0 |
| 24 | Mane  | 155 | 30 | Op     | 156 | 73.0 |
| 24 | Mane  | 155 | 31 | Plxy   | 156 | 76.0 |
| 24 | Mane  | 155 | 32 | Ro     | 156 | 76.0 |
| 24 | Mane  | 155 | 33 | Se     | 155 | 74.0 |
| 24 | Mane  | 155 | 34 | Sf     | 155 | 78.0 |
| 24 | Mane  | 155 | 35 | SpltII | 155 | 76.0 |
| 24 | Mane  | 155 | 36 | SpltG2 | 154 | 74.0 |
| 24 | Mane  | 155 | 37 | Thor   | 156 | 76.0 |
| 24 | Mane  | 155 | 38 | Tn     | 156 | 72.0 |
| 25 | Mb    | 155 | 26 | MacoB  | 155 | 98.0 |
| 25 | Mb    | 155 | 27 | MacoA  | 155 | 92.0 |
| 25 | Mb    | 155 | 28 | Mavi   | 156 | 79.0 |
| 25 | Mb    | 155 | 29 | Orle   | 156 | 77.0 |
| 25 | Mb    | 155 | 30 | Op     | 156 | 68.0 |
| 25 | Mb    | 155 | 31 | Plxy   | 156 | 80.0 |
| 25 | Mb    | 155 | 32 | Ro     | 156 | 79.0 |
| 25 | Mb    | 155 | 33 | Se     | 155 | 83.0 |
| 25 | Mb    | 155 | 34 | Sf     | 155 | 80.0 |
| 25 | Mb    | 155 | 35 | SpltII | 155 | 81.0 |
| 25 | Mb    | 155 | 36 | SpltG2 | 154 | 78.0 |
| 25 | Mb    | 155 | 37 | Thor   | 156 | 80.0 |
| 25 | Mb    | 155 | 38 | Tn     | 156 | 76.0 |
| 26 | MacoB | 155 | 27 | MacoA  | 155 | 92.0 |
| 26 | MacoB | 155 | 28 | Mavi   | 156 | 78.0 |
| 26 | MacoB | 155 | 29 | Orle   | 156 | 78.0 |
| 26 | MacoB | 155 | 30 | Op     | 156 | 73.0 |
| 26 | MacoB | 155 | 31 | Plxy   | 156 | 81.0 |
| 26 | MacoB | 155 | 32 | Ro     | 156 | 81.0 |
| 26 | MacoB | 155 | 33 | Se     | 155 | 84.0 |
| 26 | MacoB | 155 | 34 | Sf     | 155 | 80.0 |
| 26 | MacoB | 155 | 35 | SpltII | 155 | 81.0 |
| 26 | MacoB | 155 | 36 | SpltG2 | 154 | 78.0 |
| 26 | MacoB | 155 | 37 | Thor   | 156 | 79.0 |

|    |        |     |    |        |     |      |
|----|--------|-----|----|--------|-----|------|
| 26 | MacoB  | 155 | 38 | Tn     | 156 | 75.0 |
| 27 | MacoA  | 155 | 28 | Mavi   | 156 | 78.0 |
| 27 | MacoA  | 155 | 29 | Orle   | 156 | 79.0 |
| 27 | MacoA  | 155 | 30 | Op     | 156 | 75.0 |
| 27 | MacoA  | 155 | 31 | Plxy   | 156 | 81.0 |
| 27 | MacoA  | 155 | 32 | Ro     | 156 | 77.0 |
| 27 | MacoA  | 155 | 33 | Se     | 155 | 83.0 |
| 27 | MacoA  | 155 | 34 | Sf     | 155 | 81.0 |
| 27 | MacoA  | 155 | 35 | SpltII | 155 | 85.0 |
| 27 | MacoA  | 155 | 36 | SpltG2 | 154 | 80.0 |
| 27 | MacoA  | 155 | 37 | Thor   | 156 | 70.0 |
| 27 | MacoA  | 155 | 38 | Tn     | 156 | 76.0 |
| 28 | Mavi   | 156 | 29 | Orle   | 156 | 80.0 |
| 28 | Mavi   | 156 | 30 | Op     | 156 | 80.0 |
| 28 | Mavi   | 156 | 31 | Plxy   | 156 | 91.0 |
| 28 | Mavi   | 156 | 32 | Ro     | 156 | 89.0 |
| 28 | Mavi   | 156 | 33 | Se     | 155 | 75.0 |
| 28 | Mavi   | 156 | 34 | Sf     | 155 | 75.0 |
| 28 | Mavi   | 156 | 35 | SpltII | 155 | 75.0 |
| 28 | Mavi   | 156 | 36 | SpltG2 | 154 | 77.0 |
| 28 | Mavi   | 156 | 37 | Thor   | 156 | 86.0 |
| 28 | Mavi   | 156 | 38 | Tn     | 156 | 78.0 |
| 29 | Orle   | 156 | 30 | Op     | 156 | 74.0 |
| 29 | Orle   | 156 | 31 | Plxy   | 156 | 78.0 |
| 29 | Orle   | 156 | 32 | Ro     | 156 | 78.0 |
| 29 | Orle   | 156 | 33 | Se     | 155 | 79.0 |
| 29 | Orle   | 156 | 34 | Sf     | 155 | 82.0 |
| 29 | Orle   | 156 | 35 | SpltII | 155 | 80.0 |
| 29 | Orle   | 156 | 36 | SpltG2 | 154 | 78.0 |
| 29 | Orle   | 156 | 37 | Thor   | 156 | 76.0 |
| 29 | Orle   | 156 | 38 | Tn     | 156 | 80.0 |
| 30 | Op     | 156 | 31 | Plxy   | 156 | 80.0 |
| 30 | Op     | 156 | 32 | Ro     | 156 | 80.0 |
| 30 | Op     | 156 | 33 | Se     | 155 | 73.0 |
| 30 | Op     | 156 | 34 | Sf     | 155 | 72.0 |
| 30 | Op     | 156 | 35 | SpltII | 155 | 73.0 |
| 30 | Op     | 156 | 36 | SpltG2 | 154 | 70.0 |
| 30 | Op     | 156 | 37 | Thor   | 156 | 80.0 |
| 30 | Op     | 156 | 38 | Tn     | 156 | 71.0 |
| 31 | Plxy   | 156 | 32 | Ro     | 156 | 94.0 |
| 31 | Plxy   | 156 | 33 | Se     | 155 | 76.0 |
| 31 | Plxy   | 156 | 34 | Sf     | 155 | 77.0 |
| 31 | Plxy   | 156 | 35 | SpltII | 155 | 76.0 |
| 31 | Plxy   | 156 | 36 | SpltG2 | 154 | 74.0 |
| 31 | Plxy   | 156 | 37 | Thor   | 156 | 89.0 |
| 31 | Plxy   | 156 | 38 | Tn     | 156 | 78.0 |
| 32 | Ro     | 156 | 33 | Se     | 155 | 78.0 |
| 32 | Ro     | 156 | 34 | Sf     | 155 | 80.0 |
| 32 | Ro     | 156 | 35 | SpltII | 155 | 76.0 |
| 32 | Ro     | 156 | 36 | SpltG2 | 154 | 76.0 |
| 32 | Ro     | 156 | 37 | Thor   | 156 | 89.0 |
| 32 | Ro     | 156 | 38 | Tn     | 156 | 78.0 |
| 33 | Se     | 155 | 34 | Sf     | 155 | 87.0 |
| 33 | Se     | 155 | 35 | SpltII | 155 | 90.0 |
| 33 | Se     | 155 | 36 | SpltG2 | 154 | 77.0 |
| 33 | Se     | 155 | 37 | Thor   | 156 | 72.0 |
| 33 | Se     | 155 | 38 | Tn     | 156 | 77.0 |
| 34 | Sf     | 155 | 35 | SpltII | 155 | 85.0 |
| 34 | Sf     | 155 | 36 | SpltG2 | 154 | 81.0 |
| 34 | Sf     | 155 | 37 | Thor   | 156 | 77.0 |
| 34 | Sf     | 155 | 38 | Tn     | 156 | 80.0 |
| 35 | SpltII | 155 | 36 | SpltG2 | 154 | 78.0 |
| 35 | SpltII | 155 | 37 | Thor   | 156 | 74.0 |
| 35 | SpltII | 155 | 38 | Tn     | 156 | 76.0 |
| 36 | SpltG2 | 154 | 37 | Thor   | 156 | 77.0 |
| 36 | SpltG2 | 154 | 38 | Tn     | 156 | 81.0 |
| 37 | Thor   | 156 | 38 | Tn     | 156 | 79.0 |
