# Supplementary material for: Identification of a Conserved Non-Protein-Coding Genomic Element that Plays an Essential Role in Alphabaculovirus Pathogenesis
Source: PubMed Central journal article supplement (PMC3989284; doi:10.1371/journal.pone.0095322), 2014-04-16
Supplement: pone.0095322.s007.pdf [file pone.0095322.s007.pdf]

**Table S2**

| <b>N</b> | <b>Virus</b>                                             | <b>Accession</b> | <b>Genomic AT content (%)</b> | <b>CNE AT content (%)</b> | <b>Genomic AT/CNE AT ratio</b> |
|----------|----------------------------------------------------------|------------------|-------------------------------|---------------------------|--------------------------------|
| 1        | <i>Apocheima cinerarium</i> NPV (ApciNPV)                | NC_018504        | 66.6                          | 67.3                      | 1.01                           |
| 2        | <i>Adoxophyes orana</i> NPV (AdorNPV)                    | NC_011423        | 65.0                          | 70.8                      | 1.09                           |
| 3        | <i>Adoxophyes honmai</i> NPV (AdhoNPV)                   | NC_004690        | 64.4                          | 68.2                      | 1.06                           |
| 4        | <i>Ecotropis obliqua</i> NPV (EcobNPV)                   | NC_008586        | 62.4                          | 68.2                      | 1.09                           |
| 5        | <i>Clanis bilineata</i> NPV (ClibiNPV)                   | NC_008293        | 62.3                          | 73.9                      | 1.19                           |
| 6        | <i>Maruca vitrata</i> MNPV (MaviMNPV)                    | NC_008725        | 61.4                          | 68.2                      | 1.11                           |
| 7        | <i>Helicoverpa armigera</i> SNPV (HearSNPV)              | NC_003094        | 61.1                          | 69.3                      | 1.13                           |
| 8        | <i>Chrysodeixis chalcites</i> NPV (ChchNPV)              | NC_007151        | 61.0                          | 70.1                      | 1.15                           |
| 9        | <i>Trichoplusia ni</i> SNPV (TniSNPV)                    | NC_007383        | 61.0                          | 68.2                      | 1.12                           |
| 10       | <i>Rachiplusia ou</i> MNPV (RoMNPV)                      | NC_004323        | 60.9                          | 70.1                      | 1.15                           |
| 11       | <i>Thysanoplusia orichalcea</i> MNPV (ThorMNPV)          | JX467702         | 60.5                          | 69.5                      | 1.15                           |
| 12       | <i>Mamestra brassicae</i> MNPV (MbMNPV)                  | JQ_798165        | 60.1                          | 66.7                      | 1.11                           |
| 13       | <i>Mamestra configurata</i> NPV-B (MacoNPV-B)            | NC_004117        | 60.0                          | 66.7                      | 1.11                           |
| 14       | <i>Helicoverpa armigera</i> MNPV (HearMNPV)              | NC_011615        | 59.9                          | 66.0                      | 1.10                           |
| 15       | <i>Bombyx mandarina</i> NPV (BomaNPV)                    | NC_012672        | 59.8                          | 71.4                      | 1.24                           |
| 16       | <i>Spodoptera frugiperda</i> MNPV (SfMNPV)               | NC_009011        | 59.8                          | 69.3                      | 1.16                           |
| 17       | <i>Bombyx mori</i> NPV (BmNPV)                           | NC_001962        | 59.6                          | 71.4                      | 1.20                           |
| 18       | <i>Orgyia leucostigma</i> NPV (Orle NPV)                 | NC_010276        | 59.4                          | 69.5                      | 1.17                           |
| 19       | <i>Euproctis pseudoconsersa</i> NPV (EupsNPV)            | NC_012639        | 59.4                          | 71.9                      | 1.21                           |
| 20       | <i>Plutella xylostella</i> MNPV (PlxyMNPV)               | NC_008349        | 59.3                          | 68.2                      | 1.15                           |
| 21       | <i>Epiphyas postvittana</i> NPV (EppoNPV)                | NC_003083        | 59.3                          | 68.8                      | 1.16                           |
| 22       | <i>Autographa californica</i> MNPV (AcMNPV)              | NC_001623        | 59.3                          | 68.2                      | 1.15                           |
| 23       | <i>Mamestra configurata</i> NPV-A (MacoNPV-A)            | NC_003529        | 58.3                          | 64.7                      | 1.11                           |
| 24       | <i>Spodoptera litura</i> MNPV (SpliMNPV)                 | NC_003102        | 57.2                          | 69.1                      | 1.21                           |
| 25       | <i>Spodoptera exigua</i> MNPV (SeMNPV)                   | NC_002169        | 56.2                          | 66.0                      | 1.17                           |
| 26       | <i>Anticarsia gemmatalis</i> MNPV (AgMNPV)               | NC_008520        | 55.5                          | 67.6                      | 1.22                           |
| 27       | <i>Spodoptera litura</i> NPVII (SpliNPVII)               | NC_011616        | 55.0                          | 66.7                      | 1.21                           |
| 28       | <i>Hyphantria cunea</i> NPV (HycuNPV)                    | NC_007767        | 54.5                          | 64.9                      | 1.19                           |
| 29       | <i>Agrotis segetum</i> NPV (AgseNPV)                     | NC_007921        | 54.3                          | 67.3                      | 1.24                           |
| 30       | <i>Choristoneura fumiferana</i> defective NPV (CfDEFNPV) | NC_005137        | 54.2                          | 64.5                      | 1.19                           |
| 31       | <i>Agrotis ipsilon</i> MNPV (AgipMNPV)                   | NC_011345        | 51.4                          | 69.3                      | 1.35                           |
| 32       | <i>Leucania separata</i> NPV (LeseNPV)                   | NC_008348        | 51.4                          | 66.2                      | 1.29                           |
| 33       | <i>Choristoneura fumiferana</i> MNPV (CfMNPV)            | NC_004778        | 49.9                          | 69.9                      | 1.40                           |
| 34       | <i>Orgyia pseudotsugata</i> MNPV (OpMNPV)                | NC_001875        | 48.5                          | 61.5                      | 1.27                           |
| 35       | <i>Lymantria xyliina</i> MNPV (LyxyMNPV)                 | NC_013953        | 46.5                          | 62.5                      | 1.34                           |
| 36       | <i>Antheraea pernyi</i> MNPV (AnpeMNPV)                  | NC_008035        | 46.5                          | 63.6                      | 1.37                           |
| 37       | <i>Lymantria dispar</i> MNPV (LdMNPV)                    | NC_001973        | 42.5                          | 55.3                      | 1.30                           |
|          | AVERAGE                                                  |                  | 57.4                          | 62.6                      | 1.09                           |
